# Supplementary material for: A multifunctional use of bis(methylene)bis(5-bromo-2-hydroxyl salicyloylhydrazone): from metal sensing to ambient catalysis of A3 coupling reactions
Source: Royal Society of Chemistry journal article supplement (doi:10.1039/d0ra07687b), 2020-01-01
Supplement: d0ra07687b1.pdf [file d0ra07687b1.pdf]

## Supporting information

### **A multifunctional use of bis(methylene)bis(5-bromo-2-hydroxyl salicyloylhydrazone): From metals sensing to ambient catalysing A3 coupling reaction.**

Krisana Peewasan,<sup>\* a</sup> Marcel P. Merkel,<sup>b</sup> Olaf Fuhr,<sup>b,c</sup> Christopher E. Anson<sup>a</sup> and Annie K. Powell<sup>\* a,b</sup>

|                                                                                                                                                     |    |
|-----------------------------------------------------------------------------------------------------------------------------------------------------|----|
| 1. General consideration.....                                                                                                                       | 2  |
| 2. Preparation of bis((methylene)bis(5-bromo-2-hydroxyl salicyloylhydrazone) ( <b>H<sub>6</sub>L</b> )<br>.....                                     | 2  |
| 3. Preparation of [Cu <sub>2</sub> (H <sub>5</sub> L)(NO <sub>3</sub> ) <sub>2</sub> ]NO <sub>3</sub> ·0.5H <sub>2</sub> O·2CH <sub>3</sub> CN..... | 3  |
| 4. Crystal data and structure refinement .....                                                                                                      | 5  |
| 5. The application of H <sub>6</sub> L for M <sup>2+</sup> sensing.....                                                                             | 12 |
| 6. Catalytic study.....                                                                                                                             | 20 |
| 7. Stability test of catalyst.....                                                                                                                  | 45 |

**General considerations.** All reagents and solvents were used as received from commercial supplies without further purification. IR spectra were obtained from Perkin Elmer Spectrum GX FT-IR System in the range of 400-4000  $\text{cm}^{-1}$  in KBr pellets at room temperature. NMR spectra were collected on a Bruker Ultrashield plus 500 operating at 500 MHz. All chemical shifts are reported in parts per million and referenced to tetramethylsilane for  $^1\text{H}$ . Single crystal X-ray diffraction (SCXD) data were collected at 180(2) K on a STADIVARI (Ga-K $\alpha$ ,  $\lambda = 1.34143 \text{ \AA}$ , detector: Dectris Eiger2 R 4M (detector type: HPC)) (STOE). Powder X-ray diffraction (PXRD) measurements were performed on a STOE STADI-P diffractometer with Cu-K $\alpha$  radiation.

### Preparation of ligand (LH<sub>6</sub>)

5-bromosalicylaldehyde (**1**, 4.20 g, 20 mmol), *N,N'*-dimethylethylenediamine (**2**, 0.88 g, 10 mmol) and paraformaldehyde (1.2 g) refluxed in ethanol for 16 h. The corresponding intermediate (**3**) was obtained in 68 % yield after purification using column chromatography and it was further reacted with 2-hydroxybenzhydrazide (**4**, 3.48 g, 13.5 mmol) under reflux in ethanol for 16 h. The bis(methylene)bis(5-bromo-2-hydroxyl salicyloylhydrazone) (**H<sub>6</sub>L**) was obtained as a yellow solid in 92 % yield after removal of ethanol and washed with Et<sub>2</sub>O.  $^1\text{H}$  NMR (500 MHz, DMSO-*d*<sub>6</sub>)  $\delta = 12.5$  (brs, 2H), 8.57 (s, 2H), 7.89 (dd,  $J = 7.9, 1.7$  Hz, 2H), 7.56 (d,  $J = 2.6$  Hz, 2H), 7.44 – 7.32 (m, 2H), 7.25 (d,  $J = 2.6$  Hz, 2H), 6.99 – 6.81 (m, 4H), 3.65 (s, 4H), 3.14 (s, 2H), 2.73 (t,  $J = 6.0$  Hz, 2H), 2.62 (s, 6H).  $^{13}\text{C}$  NMR (126 MHz, DMSO-*d*<sub>6</sub>)  $\delta = 166.8, 160.1, 147.2, 135.0, 133.7, 131.3, 129.4, 129.1, 120.0, 118.9, 117.5, 117.1, 108.2, 56.5, 54.0, 52.2, 48.6, 43.0, 19.0$ . IR (ATR): 3657-3239 (br), 3049 (w), 2844 (w), 1646 (m), 1602 (s), 1546 (s), 1460 (m), 1333 (s), 1240 (m), 1090 (m), 1045 (w), 1026 (w), 1007 (w), 936 (w), 896 (w), 753 (s). HRMS-TOF (*m/z*): mass cal. for  $[\text{C}_{34}\text{H}_{34}\text{Br}_2\text{N}_6\text{O}_6+\text{H}]^+ = 781.0979$  *m/z*, mass found = 781.1063 *m/z*.



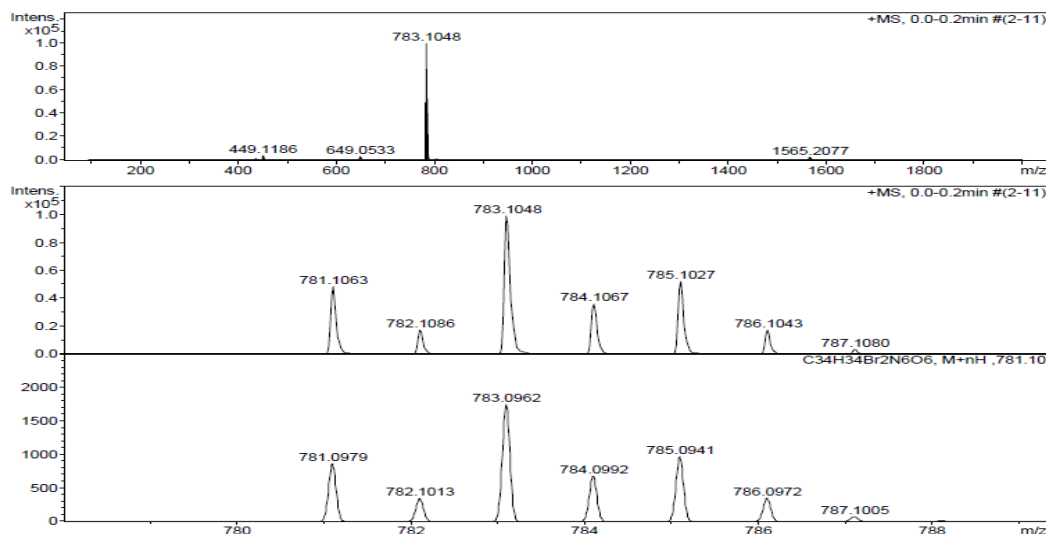

**Figure S1.**  $^1\text{H}$ ,  $^{13}\text{C}$  NMR and mass spectra of **H<sub>6</sub>L** (dissolved in *i*-PrOH).

### Preparation of the copper(II)-complex; $[\text{Cu}_2(\text{H}_5\text{L})(\text{NO}_3)_2]\text{NO}_3 \cdot 0.5\text{H}_2\text{O} \cdot 2\text{CH}_3\text{CN}$

**H<sub>6</sub>L** (78 mg, 0.1 mmol) was dissolved in 5 mL of a mixture of acetonitrile and methanol (1:1, %v/v) at room temperature. Then  $\text{Cu}(\text{NO}_3)_2 \cdot 2.5 \text{H}_2\text{O}$  (56 mg, 2.0 mmol) was added to the solution and the reaction mixture was stirred at room temperature for 30 min. After standing for 7 days, crystals were collected by filtration (70 % yield). FT-IR ( $\text{cm}^{-1}$ ) IR (ATR): 3601-2609 (br), 1613 (s), 1528 (s), 1488 (s), 1378 (s), 1280 (s), 1217 (s), 1157 (s), 1102 (m), 1039 (m), 912 (m), 754 (s).

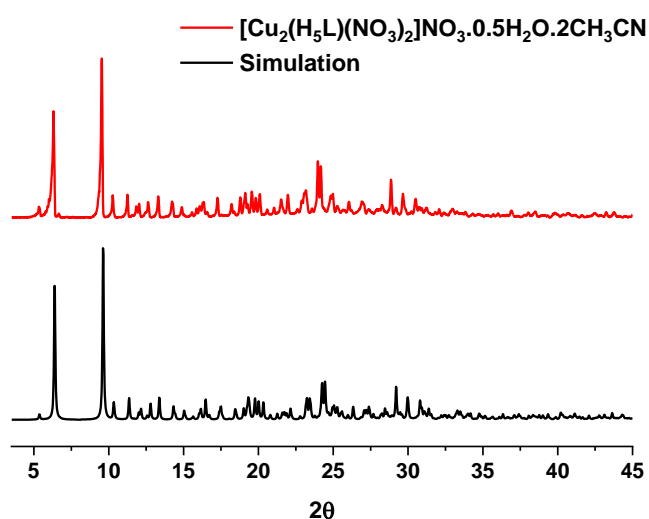

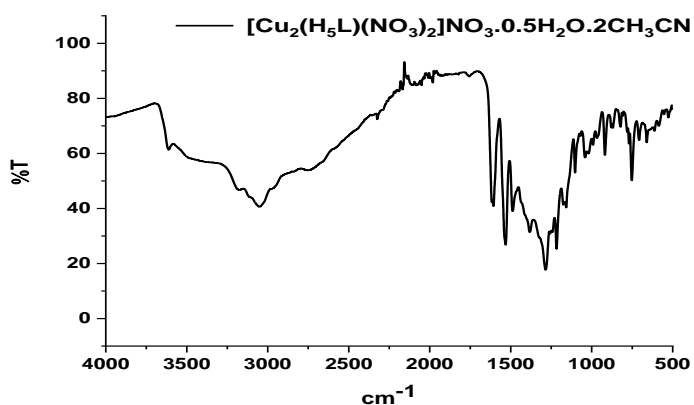

**Figure S2.** PXRD of  $[\text{Cu}_2(\text{H}_5\text{L})(\text{NO}_3)_2]\text{NO}_3 \cdot 0.5\text{H}_2\text{O} \cdot 2\text{CH}_3\text{CN}$  comparison to the simulation pattern and IR spectrum.

**Table S1.** Crystal data and structure refinement for  $[\text{Cu}_2(\text{H}_5\text{L})(\text{NO}_3)_2]\text{NO}_3 \cdot 0.5\text{H}_2\text{O} \cdot 2\text{CH}_3\text{CN}$

| Compound                                 | $[\text{Cu}_2(\text{H}_5\text{L})(\text{NO}_3)_2]\text{NO}_3 \cdot 0.5\text{H}_2\text{O} \cdot 2\text{CH}_3\text{CN}$ |
|------------------------------------------|-----------------------------------------------------------------------------------------------------------------------|
| Empirical formula                        | $\text{C}_{38}\text{H}_{40}\text{Br}_2\text{Cu}_2\text{N}_{11}\text{O}_{11.5}$                                        |
| Formula weight                           | 1185.71                                                                                                               |
| Temperature/K                            | 180(2)                                                                                                                |
| Crystal system                           | Triclinic                                                                                                             |
| Space group                              | $P\bar{1}$                                                                                                            |
| a [Å]                                    | 9.3905(4)                                                                                                             |
| b [Å]                                    | 14.9547(6)                                                                                                            |
| c [Å]                                    | 17.6271(6)                                                                                                            |
| $\alpha$ [°]                             | 109.496(3)                                                                                                            |
| $\beta$ [°]                              | 94.616(3)                                                                                                             |
| $\gamma$ [°]                             | 99.025(3)                                                                                                             |
| Volume [Å <sup>3</sup> ]                 | 2281.02(16)                                                                                                           |
| Z                                        | 2                                                                                                                     |
| $\rho_{\text{calc}}$ [cm <sup>3</sup> ]  | 1.726                                                                                                                 |
| $\mu$ [mm <sup>-1</sup> ]                | 6.914                                                                                                                 |
| F(000)                                   | 1194                                                                                                                  |
| Crystal size [mm <sup>3</sup> ]          | 0.14 × 0.03 × 0.02                                                                                                    |
| Radiation                                | GaK $\alpha$ ( $\lambda = 1.34143$ )                                                                                  |
| 2 $\theta$ range for data collection [°] | 8.38 to 116.208                                                                                                       |
| Index ranges                             | $-11 \leq h \leq 11, -6 \leq k \leq 18, -22 \leq l \leq 20$                                                           |
| Reflections collected                    | 23734                                                                                                                 |
| Independent reflections                  | 9418 [ $R_{\text{int}} = 0.0343, R_{\text{sigma}} = 0.0427$ ]                                                         |
| Data/restraints/parameters               | 9418/18/664                                                                                                           |

|                                                  |                                  |
|--------------------------------------------------|----------------------------------|
| Goodness-of-fit on $F^2$                         | 1.039                            |
| Final R indexes [ $I \geq 2\sigma(I)$ ]          | $R_1 = 0.0426$ , $wR_2 = 0.1056$ |
| Final R indexes [all data]                       | $R_1 = 0.0662$ , $wR_2 = 0.1150$ |
| Largest diff. peak/hole [ $e \text{ \AA}^{-3}$ ] | 0.82/-0.69                       |

| Bond Lengths |      |           |  |      |      |          |
|--------------|------|-----------|--|------|------|----------|
| Atom         | Atom | Length/Å  |  | Atom | Atom | Length/Å |
| Br1          | C13  | 1.901(4)  |  | N6   | C28  | 1.317(4) |
| Br2          | C25  | 1.895(3)  |  | C1   | C2   | 1.395(6) |
| Cu1          | O2   | 1.964(2)  |  | C1   | C6   | 1.407(5) |
| Cu1          | O3   | 1.893(2)  |  | C2   | C3   | 1.374(7) |
| Cu1          | O7   | 1.987(2)  |  | C3   | C4   | 1.380(7) |
| Cu1          | O10A | 2.339(4)  |  | C4   | C5   | 1.373(6) |
| Cu1          | O11B | 2.393(15) |  | C5   | C6   | 1.396(6) |
| Cu1          | N2   | 1.931(3)  |  | C6   | C7   | 1.473(5) |
| Cu2          | O4   | 1.889(2)  |  | C8   | C9   | 1.448(5) |
| Cu2          | O5   | 1.926(3)  |  | C9   | C10  | 1.426(5) |
| Cu2          | O7   | 1.999(2)  |  | C9   | C14  | 1.393(5) |
| Cu2          | O10A | 2.595(4)  |  | C10  | C11  | 1.415(5) |
| Cu2          | O10B | 2.582(13) |  | C11  | C12  | 1.376(5) |
| Cu2          | N5   | 1.910(3)  |  | C11  | C15  | 1.507(4) |
| O1           | C1   | 1.347(5)  |  | C12  | C13  | 1.396(5) |
| O2           | C7   | 1.260(4)  |  | C13  | C14  | 1.357(5) |
| O3           | C10  | 1.316(4)  |  | C16  | C17  | 1.512(5) |
| O4           | C22  | 1.320(4)  |  | C20  | C21  | 1.499(5) |
| O5           | C28  | 1.295(4)  |  | C21  | C22  | 1.420(5) |
| O6           | C30  | 1.342(5)  |  | C21  | C26  | 1.373(5) |
| O7           | N7   | 1.313(4)  |  | C22  | C23  | 1.425(5) |
| O8           | N7   | 1.223(4)  |  | C23  | C24  | 1.402(5) |
| O9           | N7   | 1.220(4)  |  | C23  | C27  | 1.436(5) |
| O10A         | N8   | 1.243(5)  |  | C24  | C25  | 1.369(6) |
| O10B         | N8   | 1.260(12) |  | C25  | C26  | 1.397(5) |
| O11A         | N8   | 1.311(5)  |  | C28  | C29  | 1.484(5) |
| O11B         | N8   | 1.114(13) |  | C29  | C30  | 1.411(5) |
| O12A         | N8   | 1.192(5)  |  | C29  | C34  | 1.392(5) |
| O12B         | N8   | 1.35(2)   |  | C30  | C31  | 1.392(6) |
| N1           | N2   | 1.387(4)  |  | C31  | C32  | 1.375(6) |
| N1           | C7   | 1.337(5)  |  | C32  | C33  | 1.387(6) |

|                    |             |             |                |             |             |             |                |
|--------------------|-------------|-------------|----------------|-------------|-------------|-------------|----------------|
| N2                 | C8          | 1.284(5)    |                | C33         | C34         | 1.378(6)    |                |
| N3                 | C15         | 1.513(4)    |                | O13         | N9          | 1.268(5)    |                |
| N3                 | C16         | 1.495(4)    |                | O14         | N9          | 1.234(4)    |                |
| N3                 | C20         | 1.512(4)    |                | O15         | N9          | 1.217(5)    |                |
| N4                 | C17         | 1.487(5)    |                | N10         | C35         | 1.129(5)    |                |
| N4                 | C18         | 1.503(5)    |                | C35         | C36         | 1.457(6)    |                |
| N4                 | C19         | 1.482(6)    |                | N11         | C37         | 1.162(9)    |                |
| N5                 | N6          | 1.377(4)    |                | C37         | C38         | 1.447(10)   |                |
| N5                 | C27         | 1.284(4)    |                |             |             |             |                |
| <b>Bond Angles</b> |             |             |                |             |             |             |                |
| <b>Atom</b>        | <b>Atom</b> | <b>Atom</b> | <b>Angle/°</b> | <b>Atom</b> | <b>Atom</b> | <b>Atom</b> | <b>Angle/°</b> |
| O2                 | Cu1         | O7          | 92.51(10)      | O1          | C1          | C6          | 118.0(3)       |
| O2                 | Cu1         | O10A        | 90.37(12)      | C2          | C1          | C6          | 119.7(4)       |
| O2                 | Cu1         | O11B        | 94.4(4)        | C3          | C2          | C1          | 119.9(4)       |
| O3                 | Cu1         | O2          | 171.62(10)     | C2          | C3          | C4          | 121.4(4)       |
| O3                 | Cu1         | O7          | 91.77(10)      | C5          | C4          | C3          | 118.8(4)       |
| O3                 | Cu1         | O10A        | 97.77(12)      | C4          | C5          | C6          | 122.0(4)       |
| O3                 | Cu1         | O11B        | 91.1(4)        | C1          | C6          | C7          | 123.4(4)       |
| O3                 | Cu1         | N2          | 93.76(11)      | C5          | C6          | C1          | 118.1(3)       |
| O7                 | Cu1         | O10A        | 73.06(11)      | C5          | C6          | C7          | 118.4(3)       |
| O7                 | Cu1         | O11B        | 108.5(3)       | O2          | C7          | N1          | 119.1(3)       |
| N2                 | Cu1         | O2          | 81.34(11)      | O2          | C7          | C6          | 119.8(3)       |
| N2                 | Cu1         | O7          | 172.32(11)     | N1          | C7          | C6          | 121.1(3)       |
| N2                 | Cu1         | O10A        | 111.38(12)     | N2          | C8          | C9          | 122.6(3)       |
| N2                 | Cu1         | O11B        | 76.7(3)        | C10         | C9          | C8          | 123.2(3)       |
| O4                 | Cu2         | O5          | 176.51(10)     | C14         | C9          | C8          | 116.7(3)       |
| O4                 | Cu2         | O7          | 90.03(10)      | C14         | C9          | C10         | 120.1(3)       |
| O4                 | Cu2         | O10A        | 92.30(11)      | O3          | C10         | C9          | 125.7(3)       |
| O4                 | Cu2         | O10B        | 85.3(3)        | O3          | C10         | C11         | 117.3(3)       |
| O4                 | Cu2         | N5          | 95.01(11)      | C11         | C10         | C9          | 117.0(3)       |
| O5                 | Cu2         | O7          | 92.94(10)      | C10         | C11         | C15         | 118.1(3)       |
| O5                 | Cu2         | O10A        | 90.55(11)      | C12         | C11         | C10         | 121.5(3)       |
| O5                 | Cu2         | O10B        | 96.5(3)        | C12         | C11         | C15         | 120.4(3)       |
| O7                 | Cu2         | O10A        | 67.20(11)      | C11         | C12         | C13         | 119.8(3)       |
| O7                 | Cu2         | O10B        | 92.0(3)        | C12         | C13         | Br1         | 120.0(3)       |
| N5                 | Cu2         | O5          | 82.00(11)      | C14         | C13         | Br1         | 119.5(3)       |
| N5                 | Cu2         | O7          | 174.90(12)     | C14         | C13         | C12         | 120.5(3)       |

|      |      |      |            |  |     |     |     |          |
|------|------|------|------------|--|-----|-----|-----|----------|
| N5   | Cu2  | O10A | 113.30(12) |  | C13 | C14 | C9  | 121.0(3) |
| N5   | Cu2  | O10B | 89.3(3)    |  | C11 | C15 | N3  | 110.9(3) |
| C7   | O2   | Cu1  | 113.2(2)   |  | N3  | C16 | C17 | 111.7(3) |
| C10  | O3   | Cu1  | 125.8(2)   |  | N4  | C17 | C16 | 111.0(3) |
| C22  | O4   | Cu2  | 125.4(2)   |  | C21 | C20 | N3  | 111.6(3) |
| C28  | O5   | Cu2  | 110.2(2)   |  | C22 | C21 | C20 | 117.2(3) |
| Cu1  | O7   | Cu2  | 126.62(13) |  | C26 | C21 | C20 | 121.5(3) |
| N7   | O7   | Cu1  | 117.7(2)   |  | C26 | C21 | C22 | 121.3(3) |
| N7   | O7   | Cu2  | 114.93(19) |  | O4  | C22 | C21 | 117.0(3) |
| Cu1  | O10A | Cu2  | 92.27(12)  |  | O4  | C22 | C23 | 124.7(3) |
| N8   | O10A | Cu1  | 120.8(3)   |  | C21 | C22 | C23 | 118.2(3) |
| N8   | O10A | Cu2  | 139.0(3)   |  | C22 | C23 | C27 | 123.8(3) |
| N8   | O10B | Cu2  | 138.7(8)   |  | C24 | C23 | C22 | 119.2(3) |
| N8   | O11B | Cu1  | 124.6(11)  |  | C24 | C23 | C27 | 117.0(3) |
| C7   | N1   | N2   | 114.9(3)   |  | C25 | C24 | C23 | 120.7(3) |
| N1   | N2   | Cu1  | 111.4(2)   |  | C24 | C25 | Br2 | 118.9(3) |
| C8   | N2   | Cu1  | 128.4(2)   |  | C24 | C25 | C26 | 121.2(3) |
| C8   | N2   | N1   | 120.2(3)   |  | C26 | C25 | Br2 | 119.9(3) |
| C16  | N3   | C15  | 112.0(3)   |  | C21 | C26 | C25 | 119.4(3) |
| C16  | N3   | C20  | 112.0(2)   |  | N5  | C27 | C23 | 123.5(3) |
| C20  | N3   | C15  | 110.5(3)   |  | O5  | C28 | N6  | 123.2(3) |
| C17  | N4   | C18  | 110.9(3)   |  | O5  | C28 | C29 | 119.5(3) |
| C19  | N4   | C17  | 112.7(3)   |  | N6  | C28 | C29 | 117.3(3) |
| C19  | N4   | C18  | 110.8(4)   |  | C30 | C29 | C28 | 121.6(3) |
| N6   | N5   | Cu2  | 114.0(2)   |  | C34 | C29 | C28 | 119.3(3) |
| C27  | N5   | Cu2  | 127.2(3)   |  | C34 | C29 | C30 | 119.0(4) |
| C27  | N5   | N6   | 118.7(3)   |  | O6  | C30 | C29 | 123.2(3) |
| C28  | N6   | N5   | 110.5(3)   |  | O6  | C30 | C31 | 117.2(4) |
| O8   | N7   | O7   | 116.9(3)   |  | C31 | C30 | C29 | 119.6(4) |
| O9   | N7   | O7   | 117.0(3)   |  | C32 | C31 | C30 | 119.9(4) |
| O9   | N7   | O8   | 126.1(4)   |  | C31 | C32 | C33 | 121.2(4) |
| O10A | N8   | O11A | 113.7(4)   |  | C34 | C33 | C32 | 119.3(4) |
| O10B | N8   | O12B | 109.2(9)   |  | C33 | C34 | C29 | 121.0(4) |
| O11B | N8   | O10B | 129.3(10)  |  | O14 | N9  | O13 | 117.6(4) |
| O11B | N8   | O12B | 121.4(10)  |  | O15 | N9  | O13 | 119.7(4) |
| O12A | N8   | O10A | 127.4(5)   |  | O15 | N9  | O14 | 122.6(4) |



| O12A           | N8   | O11A              | 118.7(5) | N10      | C35       | C36     | 178.9(5) |
|----------------|------|-------------------|----------|----------|-----------|---------|----------|
| O1             | C1   | C2                | 122.2(4) | N11      | C37       | C38     | 179.0(8) |
| Hydrogen Bonds |      |                   |          |          |           |         |          |
| D              | H    | A                 | d(D-H)/Å | d(H-A)/Å | d(D-A)/Å  | D-H-A/° |          |
| O1             | H1   | O11A <sup>1</sup> | 0.83(3)  | 1.97(5)  | 2.618(5)  | 134(6)  |          |
| O1             | H1   | O11B <sup>1</sup> | 0.83(3)  | 2.11(4)  | 2.899(15) | 158(6)  |          |
| O6             | H6   | N6                | 0.87(3)  | 1.81(4)  | 2.579(4)  | 146(5)  |          |
| N1             | H1A  | O1                | 0.78(3)  | 2.06(4)  | 2.596(4)  | 127(4)  |          |
| N3             | H3   | O3                | 0.82(3)  | 2.29(3)  | 2.844(4)  | 125(3)  |          |
| N3             | H3   | O4                | 0.82(3)  | 2.28(3)  | 2.847(4)  | 127(3)  |          |
| N4             | H4   | O13               | 0.89(3)  | 1.88(3)  | 2.775(5)  | 176(4)  |          |
| O16            | H16C | O2                | 1.05(4)  | 2.31(4)  | 3.219(10) | 144(7)  |          |
| O16            | H16D | O5                | 1.01(4)  | 2.02(4)  | 2.923(9)  | 148(8)  |          |
|                |      |                   |          |          |           |         |          |

**Table S2.** SHAPE analysis of  $[\text{Cu}_2(\text{H}_5\text{L})(\text{NO}_3)_2]\text{NO}_3 \cdot 0.5\text{H}_2\text{O} \cdot 2\text{CH}_3\text{CN}$  complex.

|                                                               |        |                                       |         |
|---------------------------------------------------------------|--------|---------------------------------------|---------|
| SHAPE v2.1                                                    |        | Continuous Shape Measures calculation |         |
| (c) 2013 Electronic Structure Group, Universitat de Barcelona |        |                                       |         |
| Contact: llunell@ub.edu                                       |        |                                       |         |
| <b>Ideal structures ML5: Cu(1)</b>                            |        |                                       |         |
| PP-5                                                          | 1 D5h  | Pentagon                              |         |
| vOC-5                                                         | 2 C4v  | Vacant octahedron                     |         |
| TBPY-5                                                        | 3 D3h  | Trigonal bipyramid                    |         |
| SPY-5                                                         | 4 C4v  | Spherical square pyramid              |         |
| JTBPY-5                                                       | 5 D3h  | Johnson trigonal bipyramid J12        |         |
| -----                                                         |        |                                       |         |
| Structure 1 [Cu]                                              |        |                                       |         |
| Cu                                                            | 5.9243 | 0.8283                                | -2.6247 |
| O                                                             | 7.1472 | -0.6364                               | -3.0913 |
| O                                                             | 4.6262 | 2.0583                                | -2.0047 |
| O                                                             | 5.3049 | 1.0261                                | -4.5019 |
| O                                                             | 7.3514 | 2.3676                                | -3.6544 |
| N                                                             | 6.5350 | 0.3822                                | -0.8478 |
| PP-5 Ideal structure CShM = 25.02739                          |        |                                       |         |

|                                        |    |        |         |         |
|----------------------------------------|----|--------|---------|---------|
| Cu                                     | M  | 6.1482 | 1.0043  | -2.7875 |
| O                                      | L1 | 7.5934 | 0.0834  | -2.5579 |
| O                                      | L3 | 4.6650 | 1.4888  | -2.0423 |
| O                                      | L4 | 5.2928 | 2.0099  | -3.9040 |
| O                                      | L5 | 7.1026 | 1.1413  | -4.2226 |
| N                                      | L2 | 6.0869 | 0.2982  | -1.2104 |
| vOC-5 Ideal structure CShM = 2.52605   |    |        |         |         |
| Cu                                     | M  | 5.9220 | 0.7700  | -2.7124 |
| O                                      | L2 | 7.1929 | -0.6537 | -3.3277 |
| O                                      | L4 | 4.6511 | 2.1937  | -2.0970 |
| O                                      | L3 | 5.1707 | 0.9009  | -4.5669 |
| O                                      | L1 | 7.2789 | 2.1760  | -3.1629 |
| N                                      | L5 | 6.6733 | 0.6391  | -0.8579 |
| TBPY-5 Ideal structure CShM = 7.26322  |    |        |         |         |
| Cu                                     | M  | 6.1482 | 1.0043  | -2.7875 |
| O                                      | L2 | 6.5470 | -0.8569 | -3.0609 |
| O                                      | L3 | 4.4558 | 1.5249  | -2.0372 |
| O                                      | L1 | 5.3951 | 1.1025  | -4.5541 |
| O                                      | L4 | 7.4417 | 2.3450  | -3.2643 |
| N                                      | L5 | 6.9012 | 0.9061  | -1.0208 |
| SPY-5 Ideal structure CShM = 2.46308   |    |        |         |         |
| Cu                                     | M  | 6.1482 | 1.0043  | -2.7875 |
| O                                      | L2 | 7.0275 | -0.6980 | -3.2545 |
| O                                      | L4 | 4.6077 | 2.0146  | -2.0833 |
| O                                      | L3 | 5.0804 | 0.7600  | -4.4274 |
| O                                      | L1 | 7.4704 | 2.3886  | -3.2617 |
| N                                      | L5 | 6.5548 | 0.5566  | -0.9104 |
| JTBPY-5 Ideal structure CShM = 9.76926 |    |        |         |         |
| Cu                                     | M  | 6.1482 | 1.0043  | -2.7875 |
| O                                      | L1 | 6.4693 | -0.5454 | -3.0428 |
| O                                      | L2 | 4.7316 | 1.4392  | -2.1756 |
| O                                      | L4 | 5.2953 | 1.1727  | -4.8813 |
| O                                      | L3 | 7.2435 | 2.1192  | -3.1440 |
| N                                      | L5 | 7.0010 | 0.8360  | -0.6936 |

**Ideal structures ML4: Cu(2)**

SP-4 1 D4h Square

T-4 2 Td Tetrahedron

|                                                |       |                           |        |        |         |
|------------------------------------------------|-------|---------------------------|--------|--------|---------|
| SS-4                                           | 3 C2v | Seesaw                    |        |        |         |
| vTBPY-4                                        | 4 C3v | Vacant trigonal bipyramid |        |        |         |
| Structure                                      | 1     | [Cu]                      |        |        |         |
| Cu                                             |       |                           | 5.9375 | 2.3798 | -5.8301 |
| O                                              |       |                           | 5.3049 | 1.0261 | -4.5019 |
| O                                              |       |                           | 4.7229 | 3.6419 | -5.1239 |
| O                                              |       |                           | 7.1631 | 1.1434 | -6.6555 |
| N                                              |       |                           | 6.6288 | 3.5475 | -7.1744 |
| <b>SP-4 Ideal structure CShM = 0.24553</b>     |       |                           |        |        |         |
| Cu                                             | M     |                           | 5.9514 | 2.3477 | -5.8572 |
| O                                              | L1    |                           | 5.3358 | 1.0561 | -4.5639 |
| O                                              | L2    |                           | 4.7360 | 3.6562 | -5.1290 |
| O                                              | L4    |                           | 7.1669 | 1.0392 | -6.5853 |
| N                                              | L3    |                           | 6.5671 | 3.6393 | -7.1504 |
| <b>T-4 Ideal structure CShM = 32.99939</b>     |       |                           |        |        |         |
| Cu                                             | M     |                           | 5.9514 | 2.3477 | -5.8572 |
| O                                              | L1    |                           | 6.1593 | 1.7087 | -4.4265 |
| O                                              | L2    |                           | 4.5122 | 2.9958 | -5.9407 |
| O                                              | L3    |                           | 6.0884 | 1.2246 | -6.9608 |
| N                                              | L4    |                           | 7.0459 | 3.4618 | -6.1006 |
| <b>SS-4 Ideal structure CShM = 18.43750</b>    |       |                           |        |        |         |
| Cu                                             | M     |                           | 6.3214 | 2.4940 | -5.5224 |
| O                                              | L1    |                           | 5.7068 | 1.2618 | -4.3046 |
| O                                              | L2    |                           | 4.5932 | 3.0208 | -5.8616 |
| O                                              | L3    |                           | 6.1998 | 1.2357 | -6.8570 |
| N                                              | L4    |                           | 6.9360 | 3.7262 | -6.7402 |
| <b>vTBPY-4 Ideal structure CShM = 33.68517</b> |       |                           |        |        |         |
| Cu                                             | M     |                           | 5.9751 | 2.5661 | -5.6208 |
| O                                              | L2    |                           | 6.2470 | 1.3847 | -4.5563 |
| O                                              | L3    |                           | 4.4658 | 3.0521 | -5.9186 |
| O                                              | L1    |                           | 5.8566 | 1.4741 | -6.8025 |
| N                                              | L4    |                           | 7.2126 | 3.2616 | -6.3876 |

## The application of H<sub>6</sub>L for M<sup>2+</sup> sensing

The optical properties of the H<sub>6</sub>L + M<sup>2+</sup> were investigated. A stock solution of H<sub>6</sub>L (100 μM) in DMSO was prepared and 25 μM and used as the working solution in this experiment. The absorption maximum at 310 nm was selected as an excitation wavelength for the fluorescence experiment.

### 1. Pb<sup>2+</sup> sensing

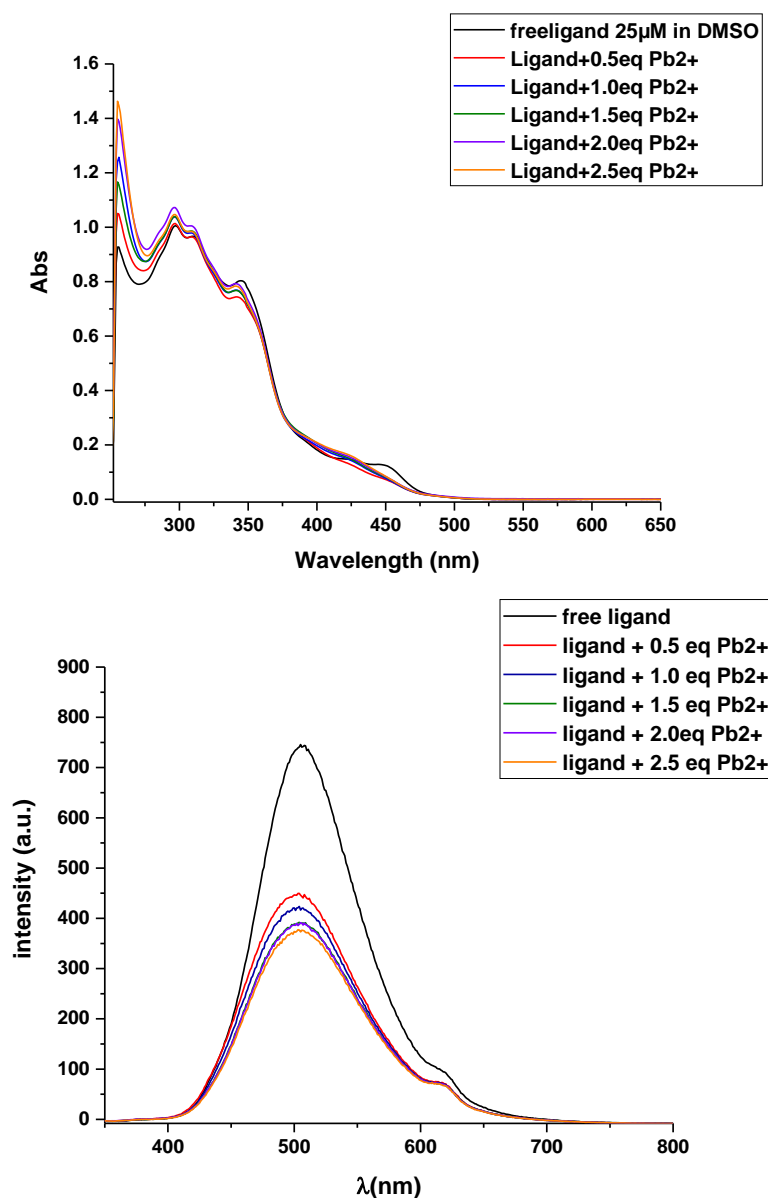

**Figure S3.** a) Uv-vis titration spectra, b) fluorescence titration spectra ( $\lambda_{\text{ex}} = 310$  nm, slit; 10 nm/10 nm) of H<sub>6</sub>L (25 μM) with increasing amount of Pb<sup>2+</sup> in DMSO.

## 2. Cd<sup>2+</sup> sensing

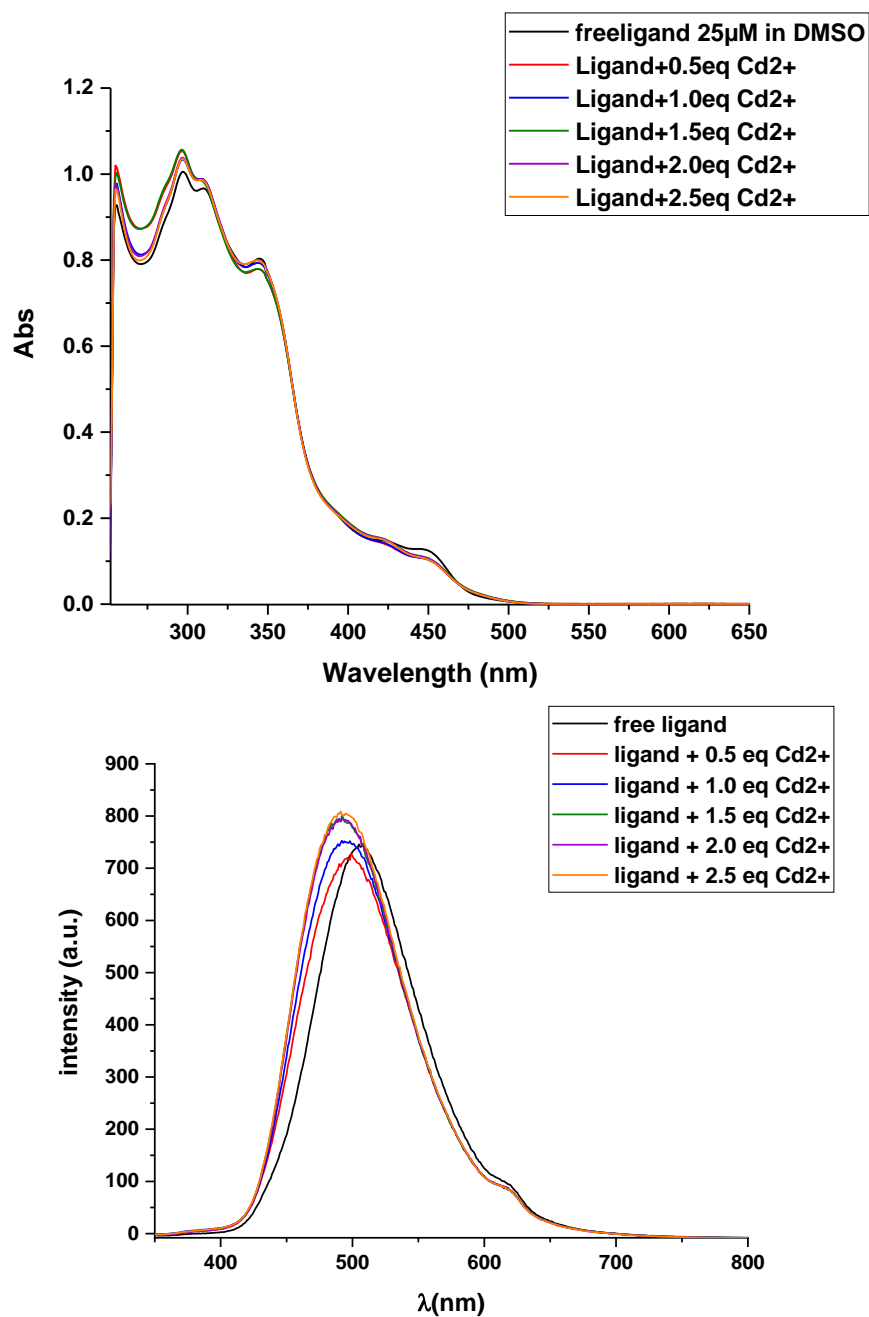

**Figure S4.** a) Uv-vis titration spectra, b) fluorescence titration spectra ( $\lambda_{\text{ex}} = 310$  nm, slit; 10 nm/10 nm) of H<sub>6</sub> L (25 μM) with increasing amount of Cd<sup>2+</sup> in DMSO.

### 3. Zn<sup>2+</sup> sensing

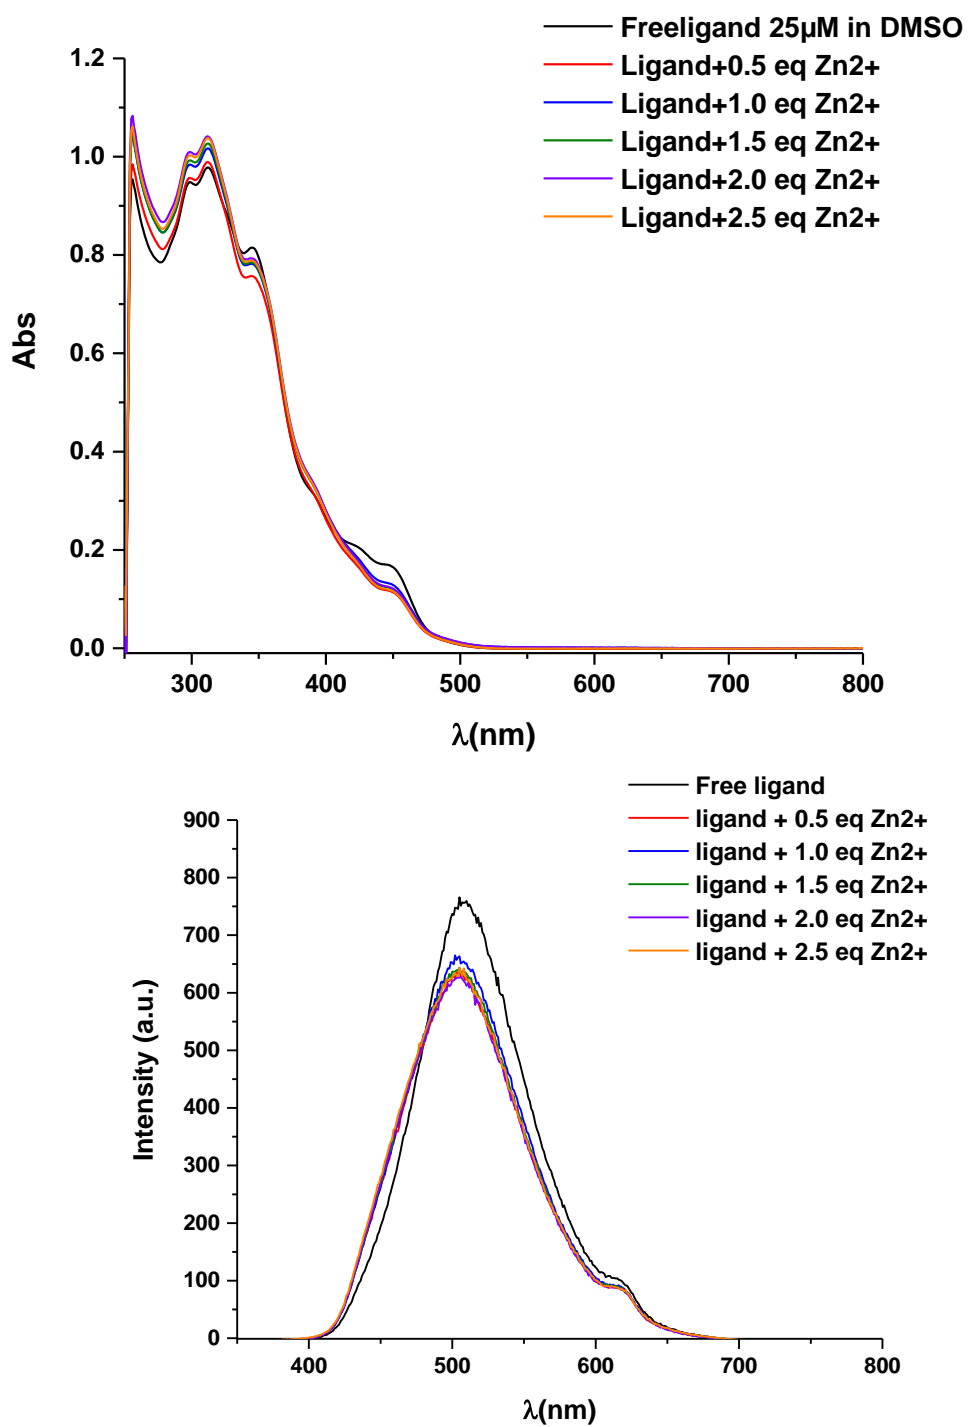

**Figure S5.** a) Uv-vis titration spectra, b) fluorescence titration spectra ( $\lambda_{\text{ex}} = 310 \text{ nm}$ , slit; 10 nm/10 nm) of H<sub>6</sub>L (25 μM) with increasing amount of Zn<sup>2+</sup> in DMSO.

#### 4. Ni<sup>2+</sup> sensing

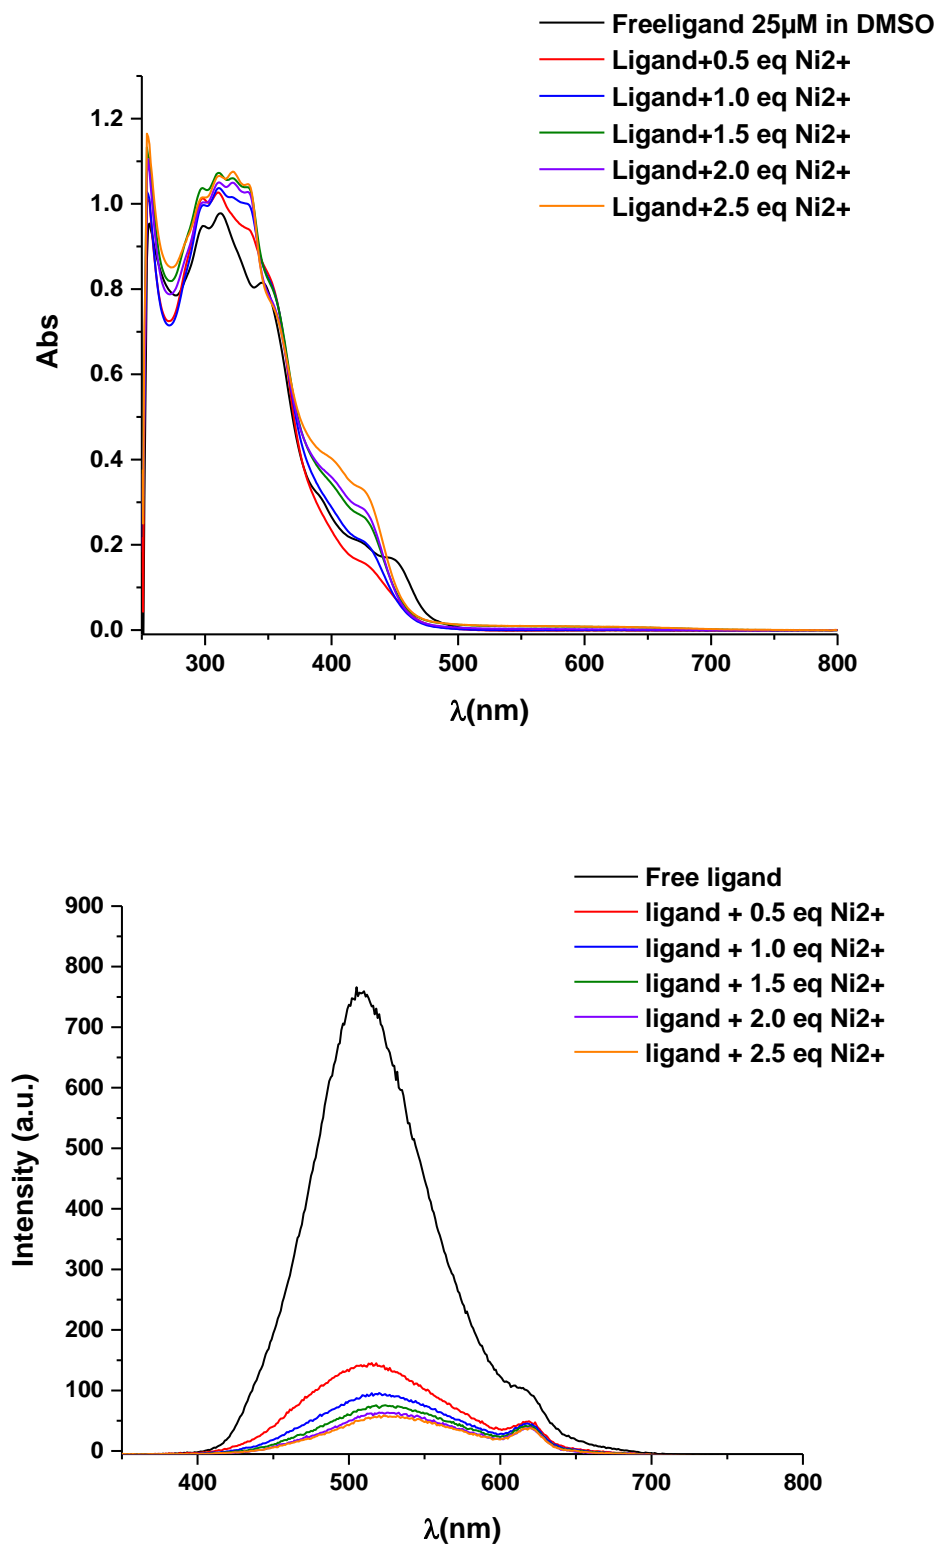

**Figure S6.** a) Uv-vis titration spectra, b) fluorescence titration spectra ( $\lambda_{\text{ex}} = 310$  nm, slit; 10 nm/10 nm) of H<sub>6</sub>L (25  $\mu$ M) with increasing amount of Ni<sup>2+</sup> in DMSO.

## 5. Co<sup>2+</sup> sensing

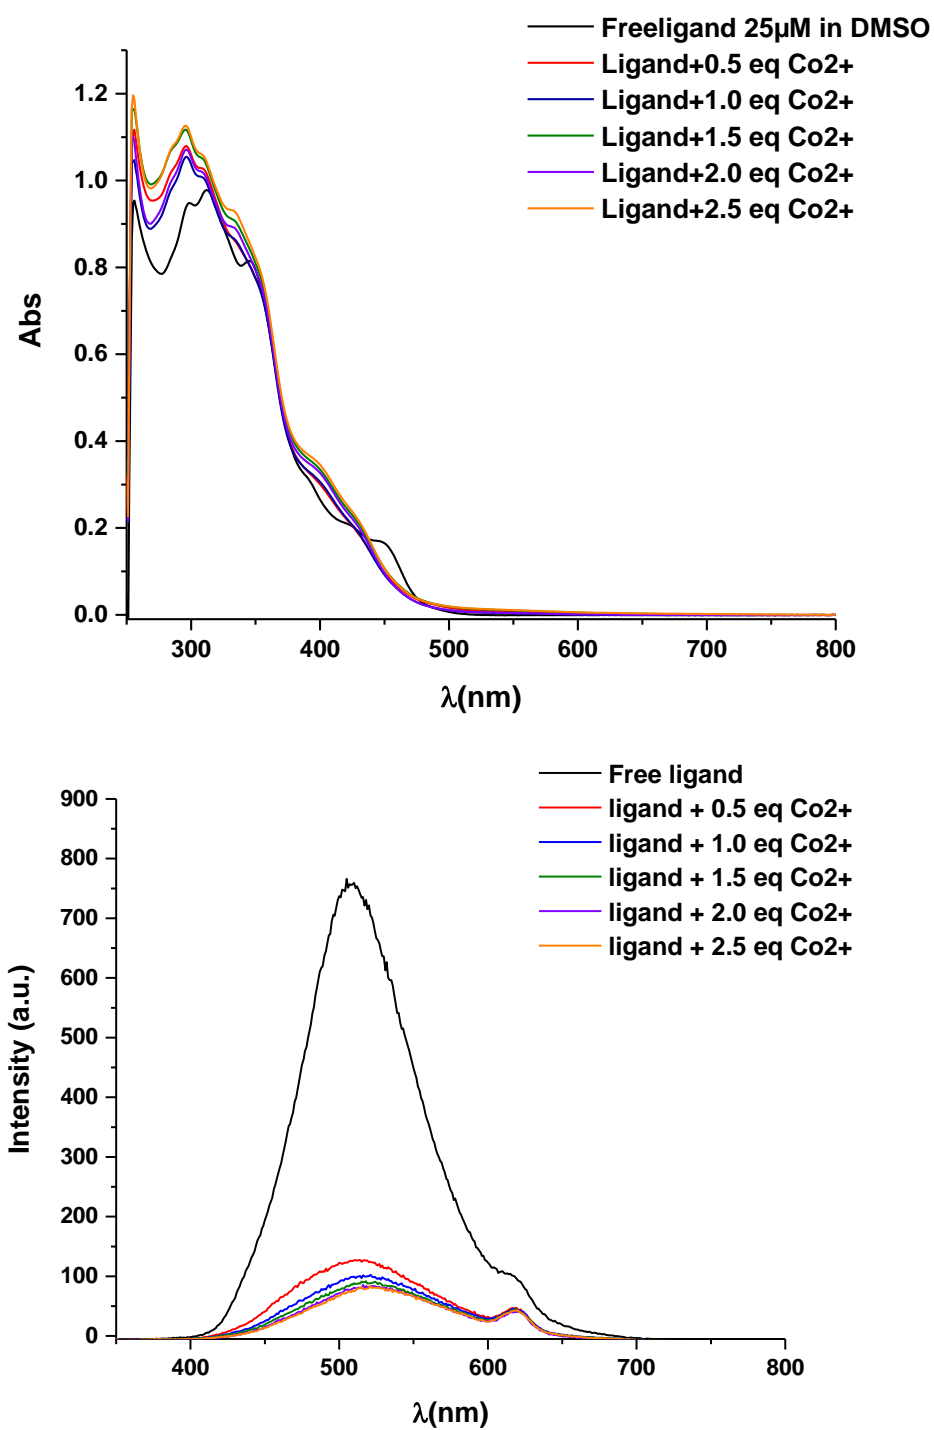

**Figure S7.** a) Uv-vis titration spectra, b) fluorescence titration spectra ( $\lambda_{\text{ex}} = 310 \text{ nm}$ , slit; 10 nm/10 nm) of H<sub>6</sub>L (25  $\mu\text{M}$ ) with increasing amount of Co<sup>2+</sup> in DMSO.



## 6. Fe<sup>2+</sup> sensing

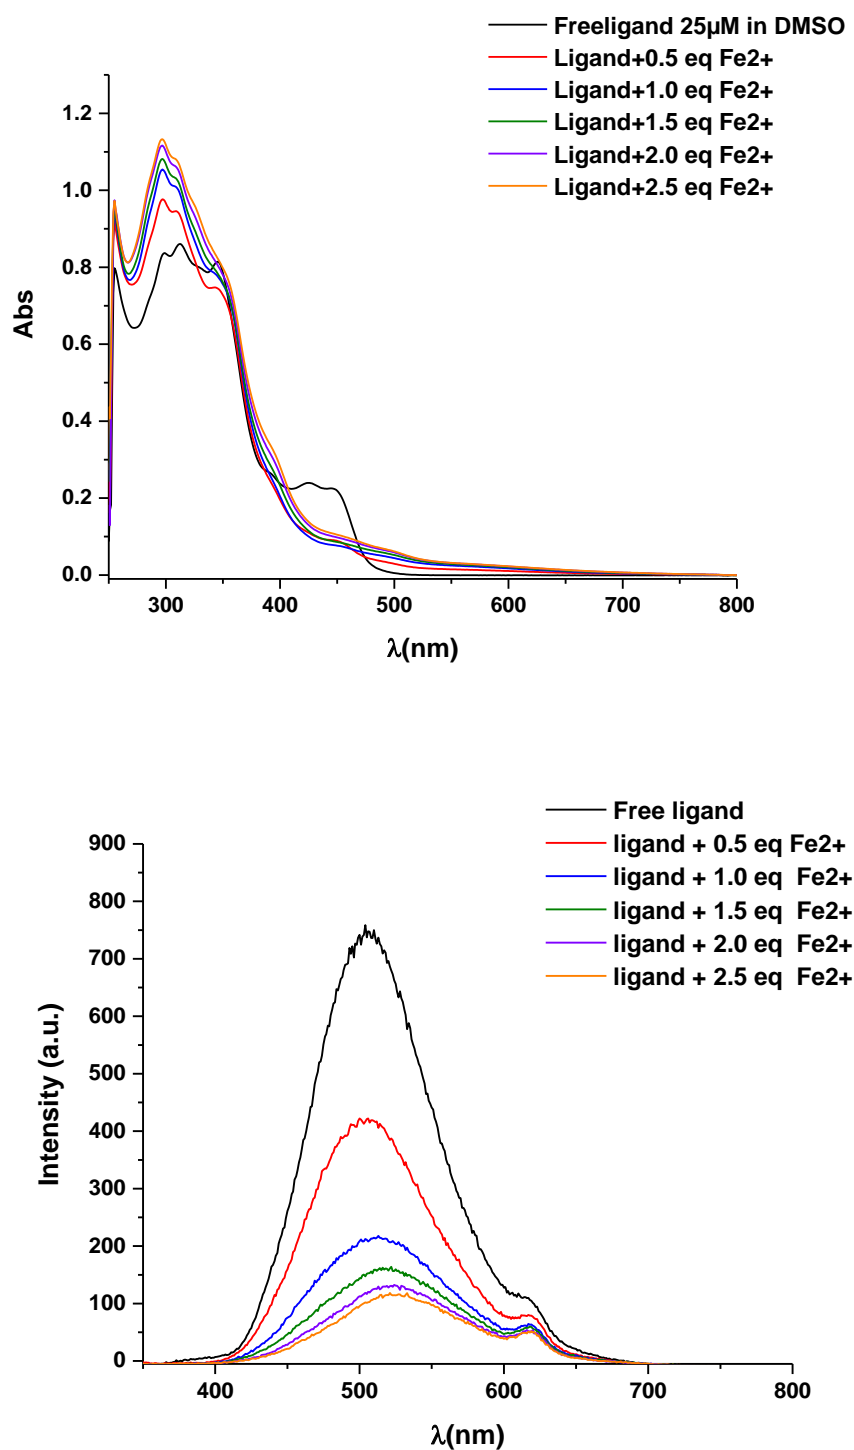

**Figure S8.** a) Uv-vis titration spectra, b) fluorescence titration spectra ( $\lambda_{ex} = 310$  nm, slit; 10 nm/10 nm) of **H<sub>6</sub>L** (25  $\mu$ M) with increasing amount of Fe<sup>2+</sup> in DMSO.

## 7. Sn<sup>2+</sup> sensing

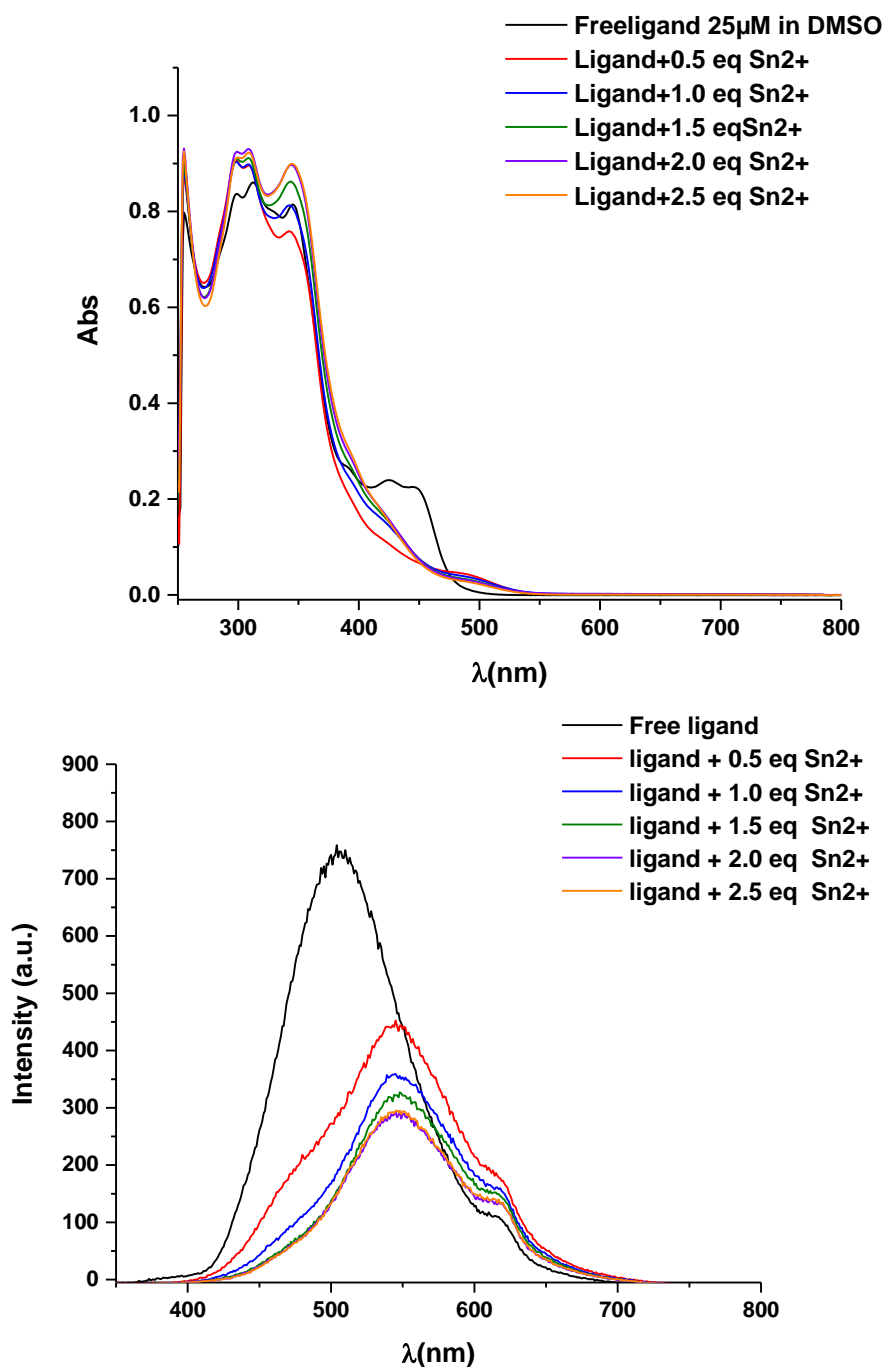

**Figure S9.** a) Uv-vis titration spectra, b) fluorescence titration spectra ( $\lambda_{\text{ex}} = 310 \text{ nm}$ , slit; 10 nm/10 nm) of H<sub>6</sub>L (25  $\mu\text{M}$ ) with increasing amount of Fe<sup>2+</sup> in DMSO.

### Catalytic study.

The investigation of the potential of the  $[\text{Cu}_2(\text{H}_5\text{L})(\text{NO}_3)_2]^+$  complex as a catalyst for the reaction of aldehyde, alkyne and amine (A3 coupling) was performed. Cyclopentane carboxaldehyde (**5**), piperidine (**6**) and phenylacetylene (**7**) were chosen as model reagents. The catalytic loading for the A3 coupling reaction was first investigated by varying the amount of catalyst from 0.1-5.0 mol % with the reaction performed in air at room temperature for 16 h (**Figure S10**). The efficiency of this catalytic system can be followed by a disappearance of the aldehyde proton signal at 9.60 ppm and the appearance of a new peak assigned to a quaternary proton of the propargylamine product at 3.50 ppm.

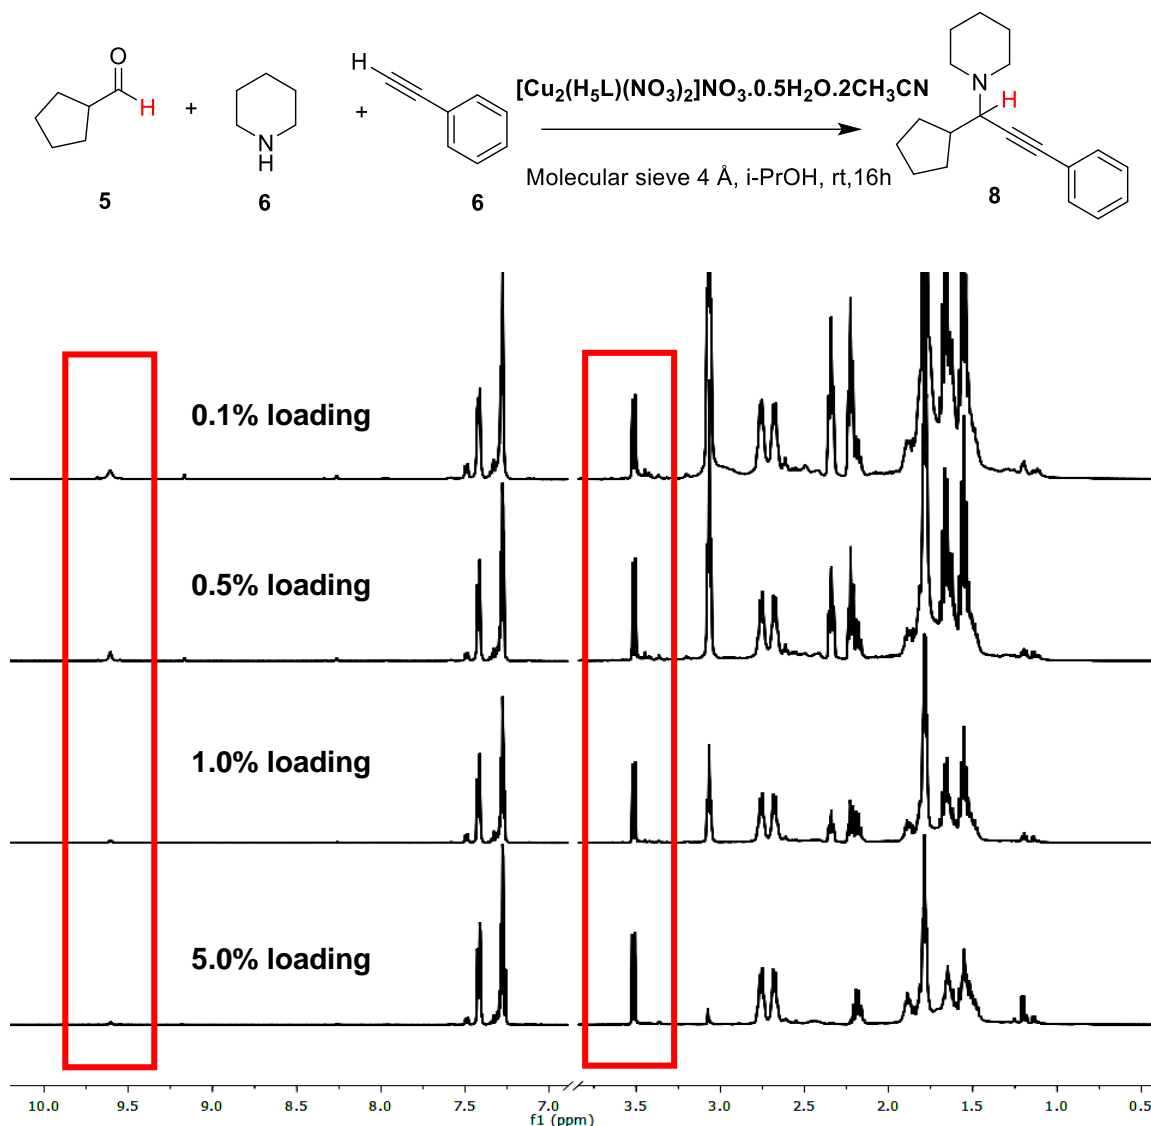

**Figure S10.**  $^1\text{H}$  NMR spectra for optimisation reaction of A3 coupling reaction with various catalytic loading.

**General procedure for the investigation of the efficiency of catalyst for A3 coupling reactions.** To a solution of  $[\text{Cu}_2(\text{H}_5\text{L})(\text{NO}_3)_2]\text{NO}_3 \cdot 0.5\text{H}_2\text{O} \cdot 2\text{CH}_3\text{CN}$  (1 mol%) and 200 mg 4Å molecular sieve in *i*-PrOH (5 mL) were added aldehyde (215  $\mu\text{l}$ , 2.0 mmol), amine (220  $\mu\text{l}$ , 2.2 mmol) and alkyne (330  $\mu\text{l}$ , 2.4 mmol). The mixture was stirred vigorously at room temperature for 24 h. The resulting solution was filtered through celite, washed with  $\text{CH}_2\text{Cl}_2$ . The solvent was removed under reduced pressure and the crude product was purified by column chromatography (EtOAc-Hexane: 1:4, %v/v) to obtain oily product.

**Compound 8:**  $^1\text{H}$  NMR (500 MHz, Chloroform-*d*)  $\delta$ : 7.50 – 7.41 (m, 2H), 7.35 – 7.26 (m, 3H), 3.24 (d,  $J = 9.3$  Hz, 1H), 2.75 – 2.65 (m, 2H), 2.53 – 2.40 (m, 2H), 2.25 (p,  $J = 8.4, 7.8$  Hz, 1H), 1.98 – 1.86 (m, 2H), 1.83 – 1.74 (m, 1H), 1.71 – 1.40 (m, 13H).  $^{13}\text{C}$  NMR (126 MHz,  $\text{CDCl}_3$ )  $\delta$ : 131.6 (2 $\times$ CH), 128.0 (2 $\times$ CH), 127.5 (CH), 123.7 (C), 87.9 (C $\equiv$ C), 85.4 (C $\equiv$ C), 63.6 (CH), 50.7 (CH), 42.3 (2 $\times$ CH $_2$ ), 30.8 (CH $_2$ ), 30.3 (CH $_2$ ), 26.2 (2 $\times$ CH $_2$ ), 25.3 (CH $_2$ ), 25.1 (CH $_2$ ), 24.5 (CH $_2$ ).

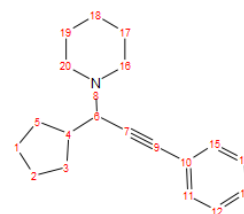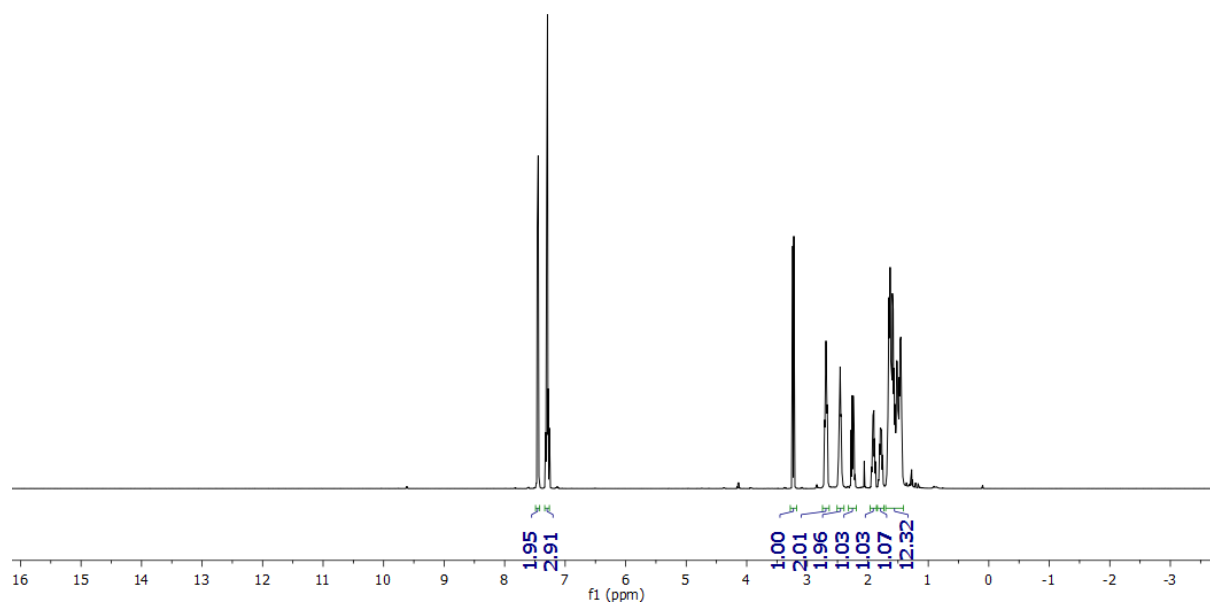

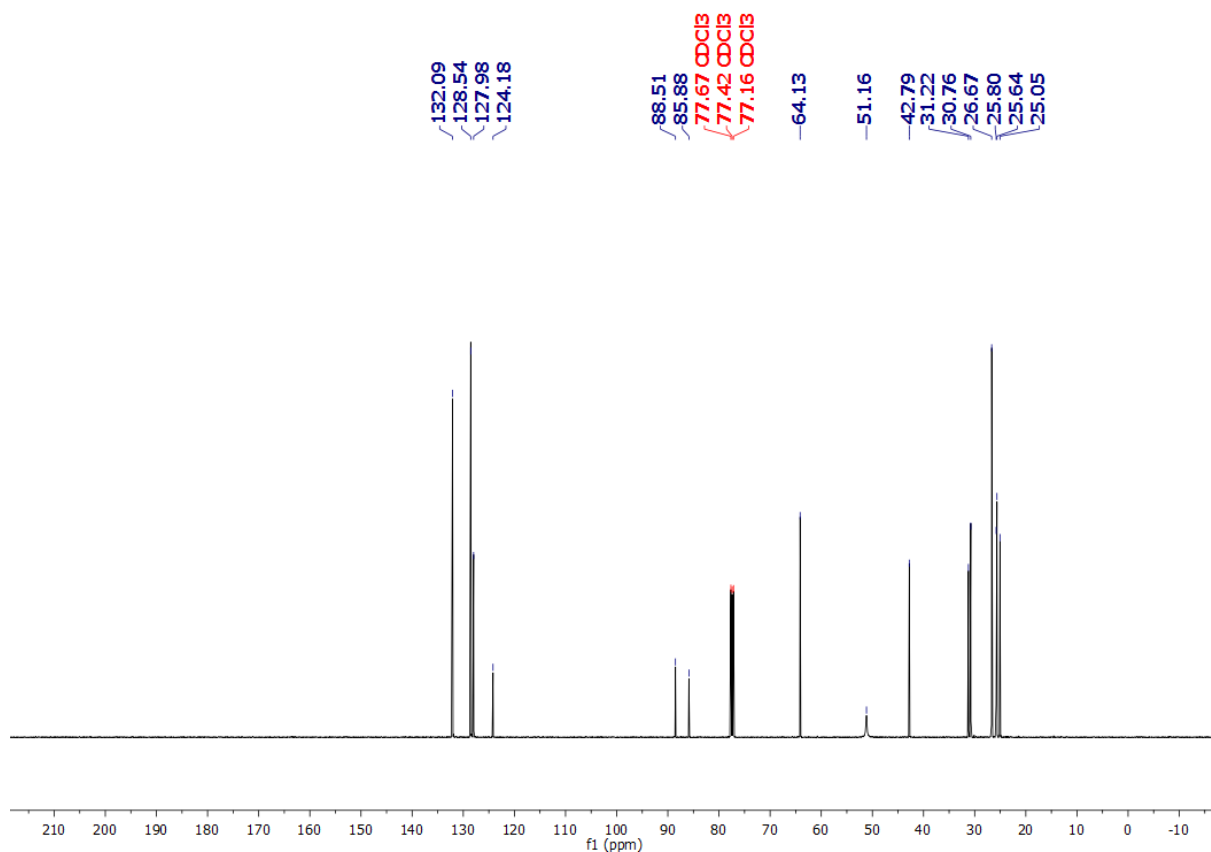

**Figure S11.**  $^{13}\text{C}$  NMR spectra in  $\text{CDCl}_3$  for compound 8.

**Compound 9:**  $^1\text{H}$  NMR (500 MHz, Chloroform- $d$ )  $\delta$ : 7.47 – 7.41 (m, 2H), 7.33 – 7.24 (m, 3H), 3.53 (d,  $J$  = 8.4 Hz, 1H), 2.78 (qd,  $J$  = 6.5, 6.1, 2.9 Hz, 2H), 2.69 (qd,  $J$  = 7.3, 6.6, 2.8 Hz, 2H), 2.20 (h,  $J$  = 8.3 Hz, 1H), 1.96 – 1.86 (m, 1H), 1.87 – 1.74 (m, 5H), 1.70 – 1.47 (m, 6H).  $^{13}\text{C}$  NMR (126 MHz,  $\text{CDCl}_3$ )  $\delta$ : 132.1 (2 $\times$ CH), 128.5 (2 $\times$ CH), 128.0 (CH), 124.0 (C), 88.4 (C $\equiv$ C), 85.6 (C $\equiv$ C), 60.4 (CH), 50.3 (2 $\times$ CH $_2$ ), 44.3 (CH $_2$ ), 30.9 (CH $_2$ ), 30.6 (CH $_2$ ), 25.9 (CH $_2$ ), 25.8 (CH $_2$ ), 23.9 (2 $\times$ CH $_2$ ).

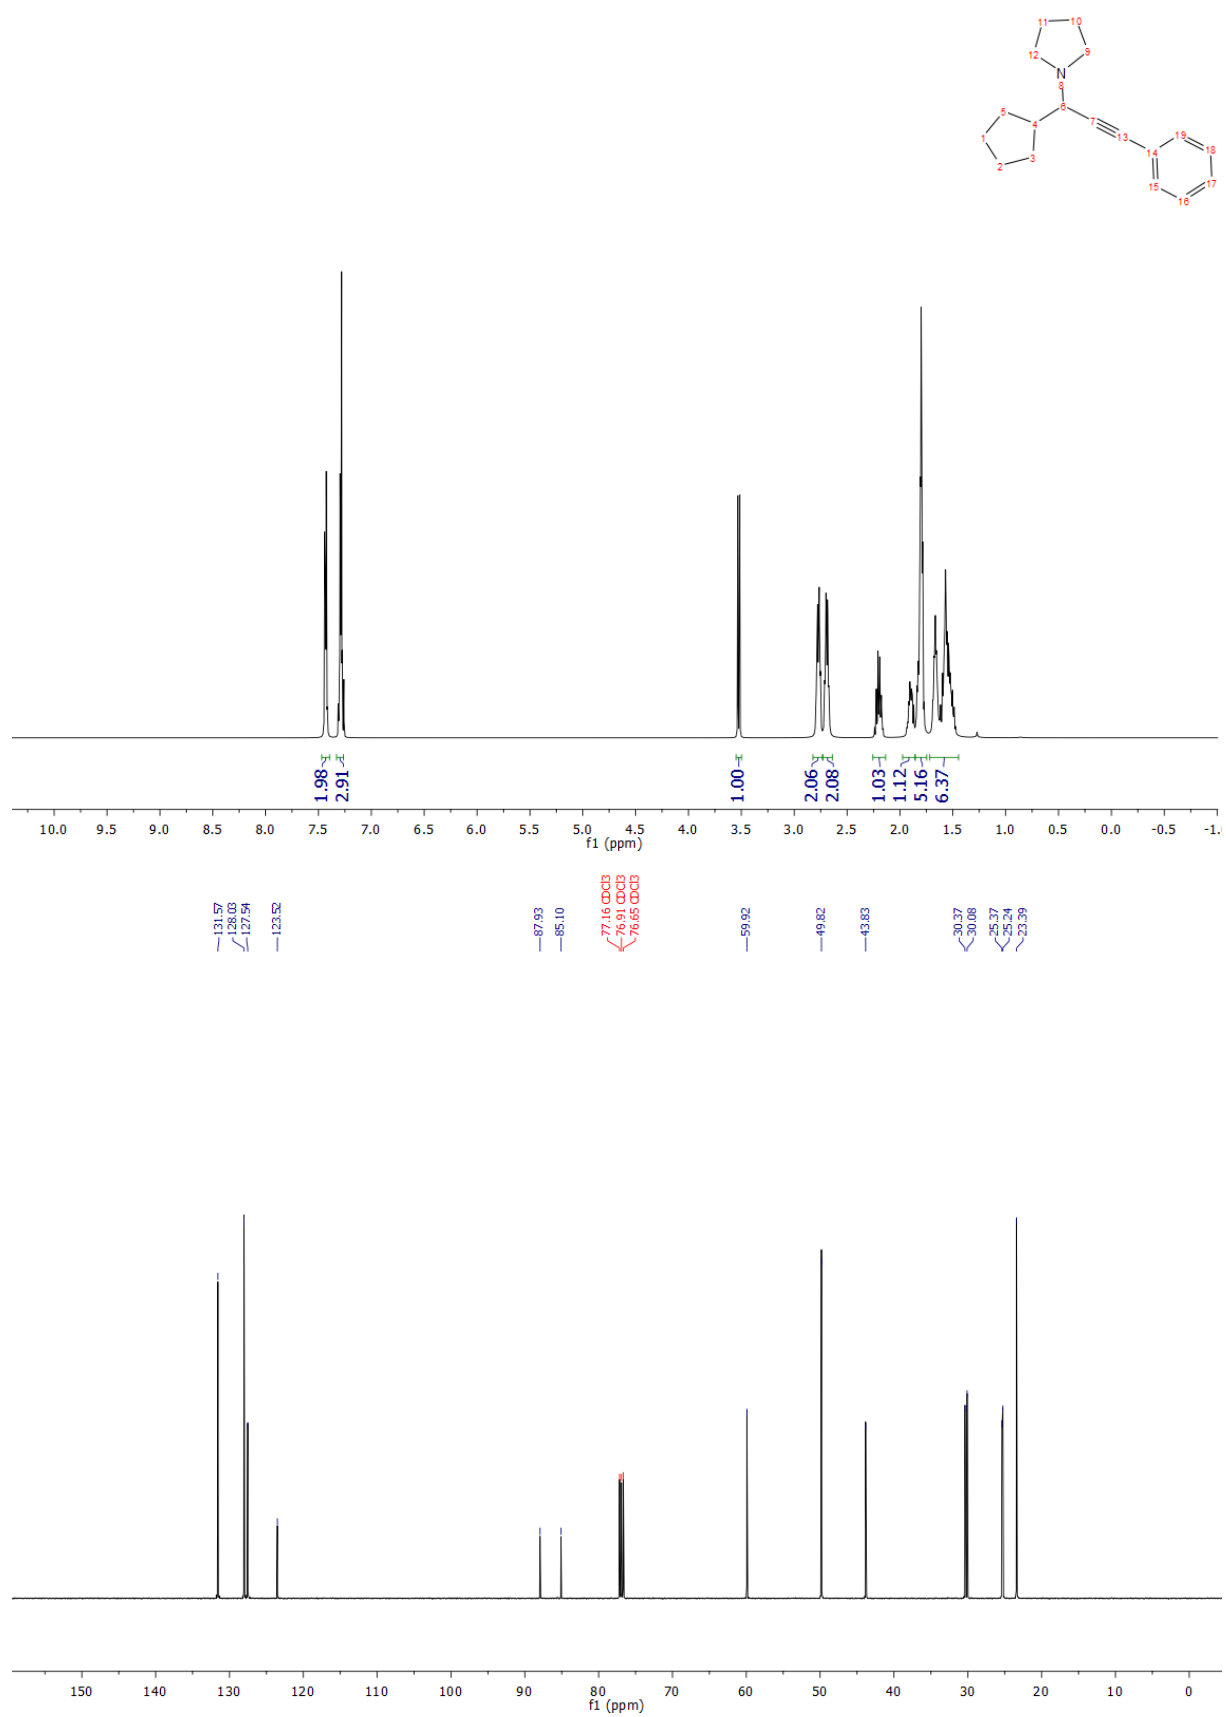

**Figure S12.** <sup>1</sup>H and <sup>13</sup>C NMR spectra in CDCl<sub>3</sub> for compound 9.

**Compound 10:**  $^1\text{H}$  NMR (500 MHz, Chloroform-d)  $\delta$ : 7.42 – 7.36 (m, 2H), 7.01 – 6.95 (m, 2H), 3.50 (d,  $J = 8.3$  Hz, 1H), 2.80 – 2.71 (m, 2H), 2.71 – 2.63 (m, 2H), 2.18 (h,  $J = 8.1$  Hz, 1H), 1.92 – 1.84 (m, 1H), 1.84 – 1.75 (m, 5H), 1.71 – 1.58 (m, 2H), 1.60 – 1.44 (m, 4H).  $^{13}\text{C}$  NMR (126 MHz,  $\text{CDCl}_3$ )  $\delta$ : 162.1 (d,  $J = 248.7$  Hz, C), 133.4 (d,  $J = 8.2$  Hz,  $2\times\text{CH}$ ), 119.6 (d,  $J = 3.5$  Hz, CH), 115.3 (d,  $J = 21.9$  Hz,  $2\times\text{CH}$ ), 87.6 ( $\text{C}\equiv\text{C}$ ), 84.1 ( $\text{C}\equiv\text{C}$ ), 60.4 (CH), 50.3 ( $2\times\text{CH}_2$ ), 44.3 ( $\text{CH}_2$ ), 30.9 ( $\text{CH}_2$ ), 30.6 ( $\text{CH}_2$ ), 25.9 ( $\text{CH}_2$ ), 25.8 ( $\text{CH}_2$ ), 23.9 ( $2\times\text{CH}_2$ ).

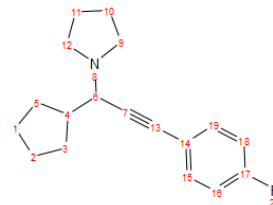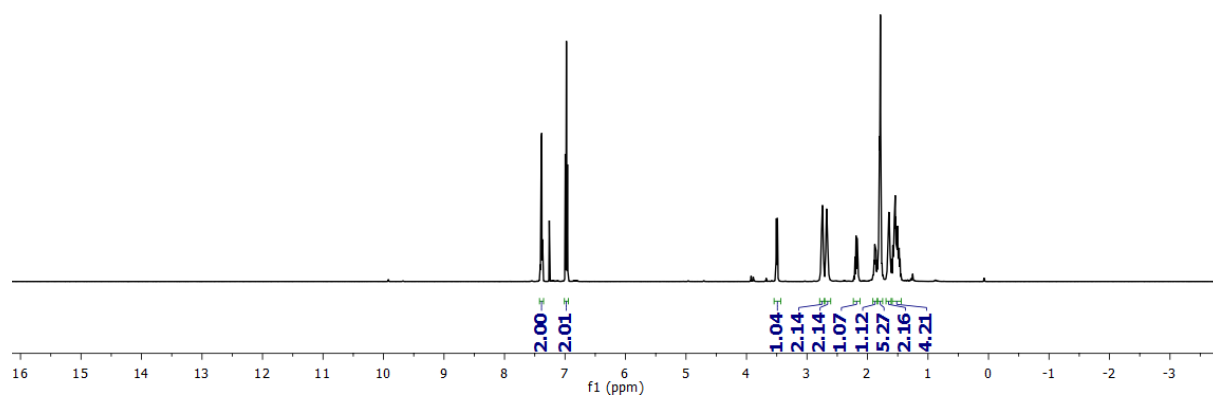

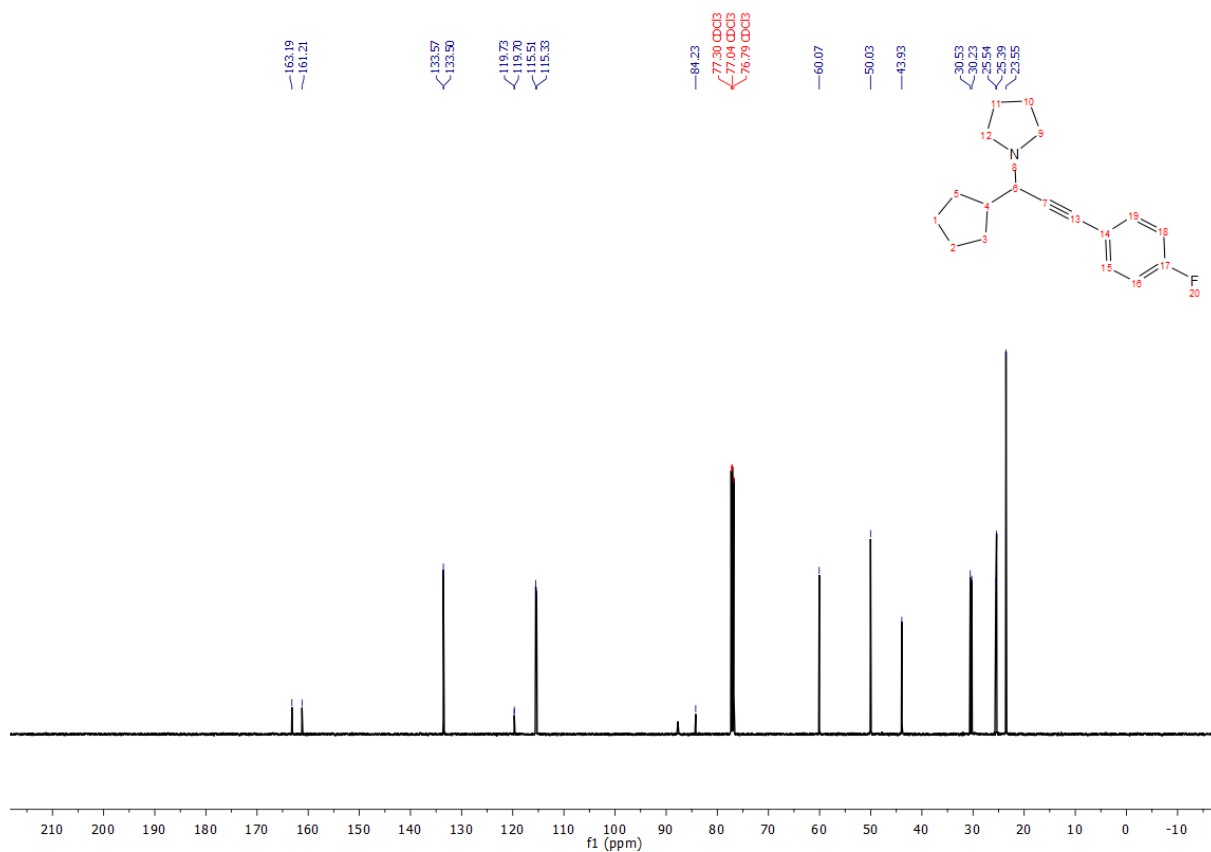

**Figure S13.**  $^1\text{H}$  and  $^{13}\text{C}$  NMR spectra in  $\text{CDCl}_3$  for compound 10.

**Compound 11:**  $^1\text{H}$  NMR (500 MHz, Chloroform-d)  $\delta$ : 7.69 – 7.65 (m, 2H), 7.58 – 7.52 (m, 2H), 7.41 – 7.29 (m, 6H), 4.83 (s, 1H), 2.59 (d,  $J = 6.4$  Hz, 4H), 1.62 (tq,  $J = 12.9, 5.6$  Hz, 4H), 1.54 – 1.41 (m, 2H).  $^{13}\text{C}$  NMR (126 MHz,  $\text{CDCl}_3$ )  $\delta$ : 138.7 (C), 131.9 (2 $\times$ CH), 128.6 (2 $\times$ CH), 128.3 (2 $\times$ CH), 128.1 (2 $\times$ CH), 127.5 (2 $\times$ CH), 123.4 (C), 87.9 (C $\equiv$ C), 86.1 (C $\equiv$ C), 62.5 (CH), 50.8 (2 $\times$ CH $_2$ ), 26.2 (2 $\times$ CH $_2$ ), 24.5 (2 $\times$ CH $_2$ ).



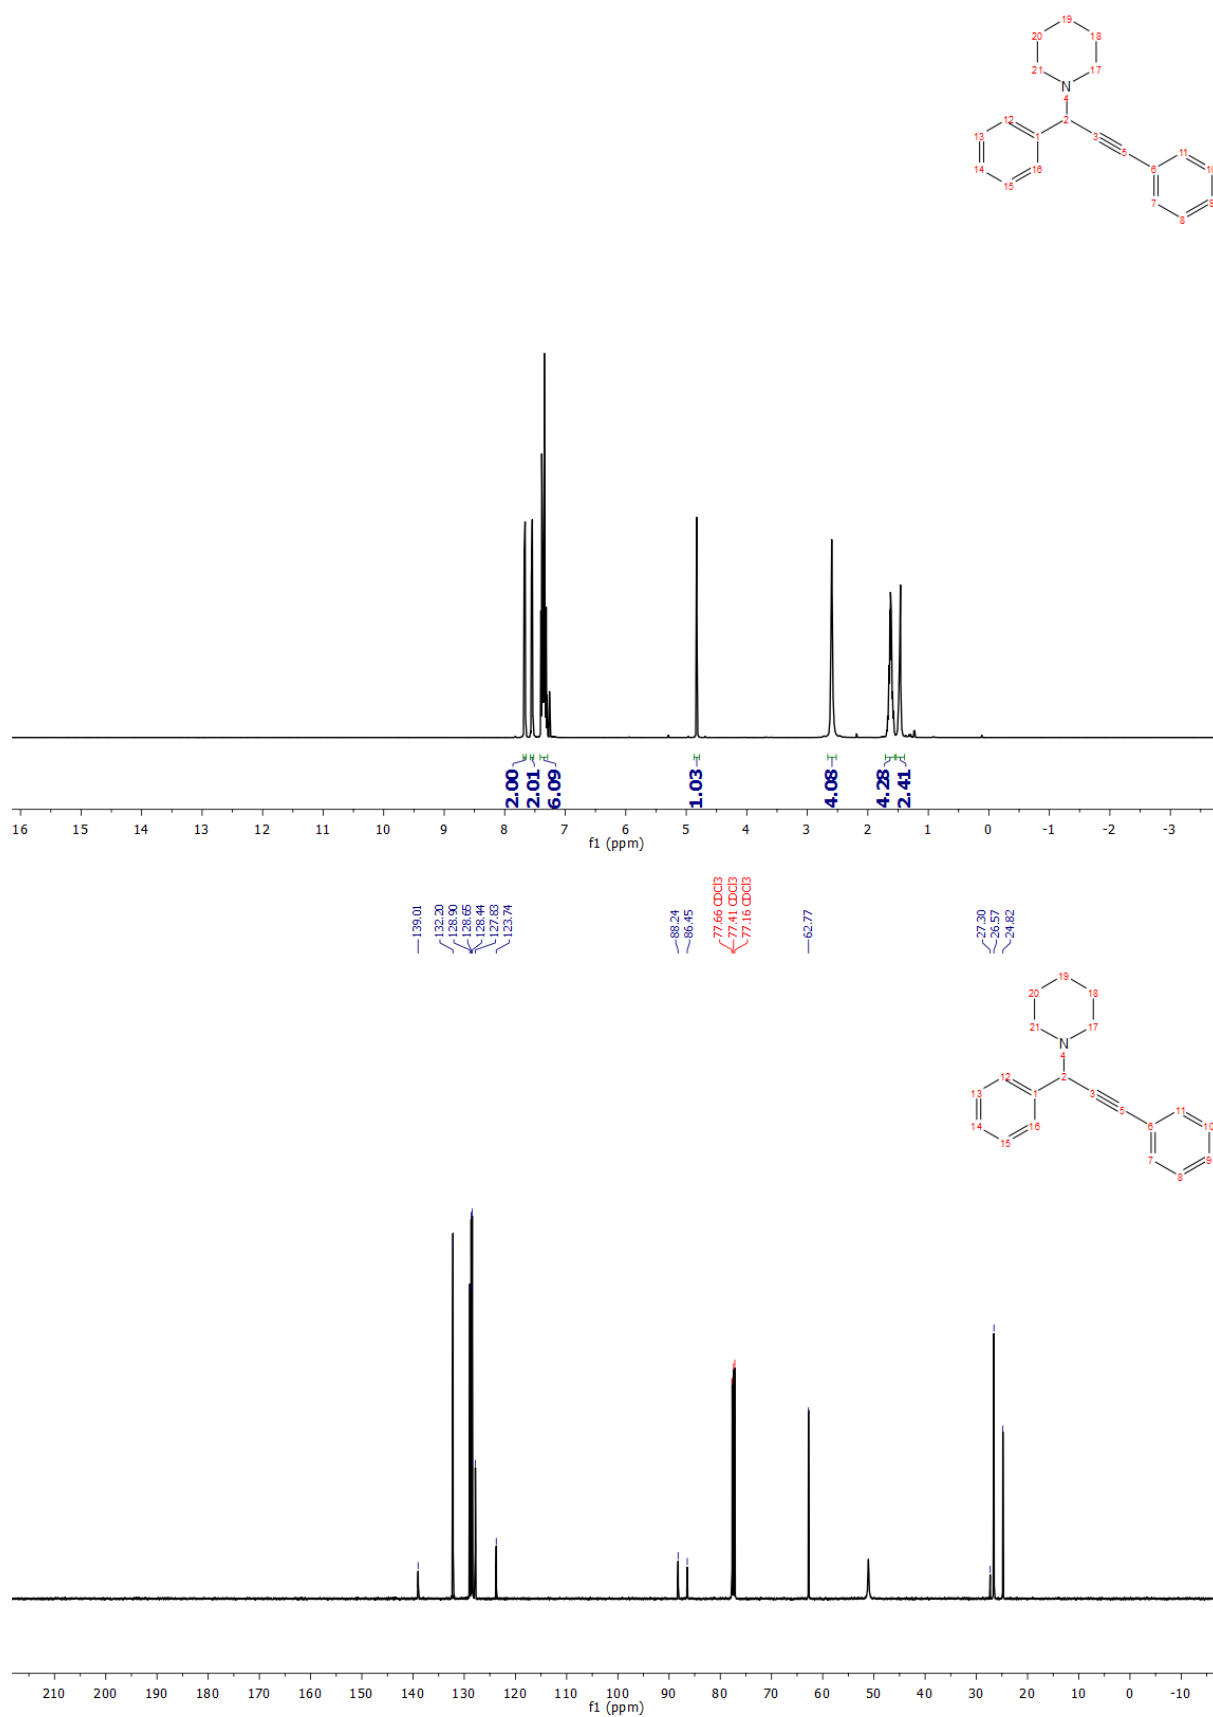

**Figure S14.** <sup>1</sup>H and <sup>13</sup>C NMR spectra in CDCl<sub>3</sub> for compound 11.

**Compound 12:**  $^1\text{H}$  NMR (500 MHz, Chloroform- $d$ )  $\delta$ : 7.46 – 7.40 (m, 2H), 7.32 – 7.27 (m, 3H), 3.68 (dd,  $J$  = 9.1, 5.7 Hz, 1H), 2.82 – 2.74 (m, 2H), 2.73 – 2.65 (m, 2H), 1.87 – 1.77 (m, 4H), 1.77 – 1.67 (m, 2H), 1.62 – 1.52 (m, 1H), 1.51 – 1.41 (m, 1H), 1.41 – 1.33 (m, 2H), 0.93 (t,  $J$  = 7.3 Hz, 3H).  $^{13}\text{C}$  NMR (126 MHz,  $\text{CDCl}_3$ )  $\delta$ : 131.6 (2 $\times$ CH), 128.1 (2 $\times$ CH), 128.3 (CH), 123.4 (C), 88.2 ( $\text{C}\equiv\text{C}$ ), 85.4 ( $\text{C}\equiv\text{C}$ ), 55.0 (CH), 49.6 (2 $\times$  $\text{CH}_2$ ), 34.7 ( $\text{CH}_2$ ), 28.8 ( $\text{CH}_2$ ), 23.4 (2 $\times$   $\text{CH}_2$ ), 22.4 ( $\text{CH}_2$ ), 19.9 ( $\text{CH}_3$ ).

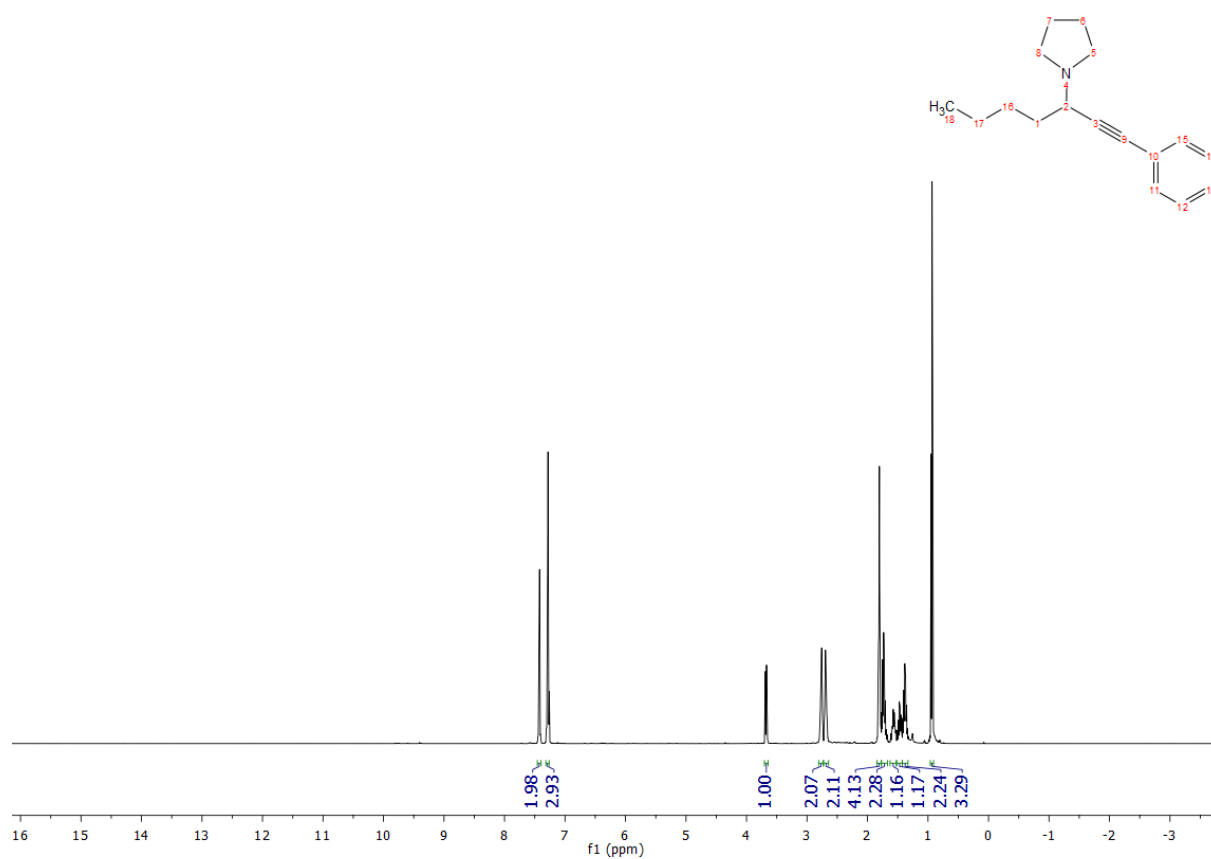

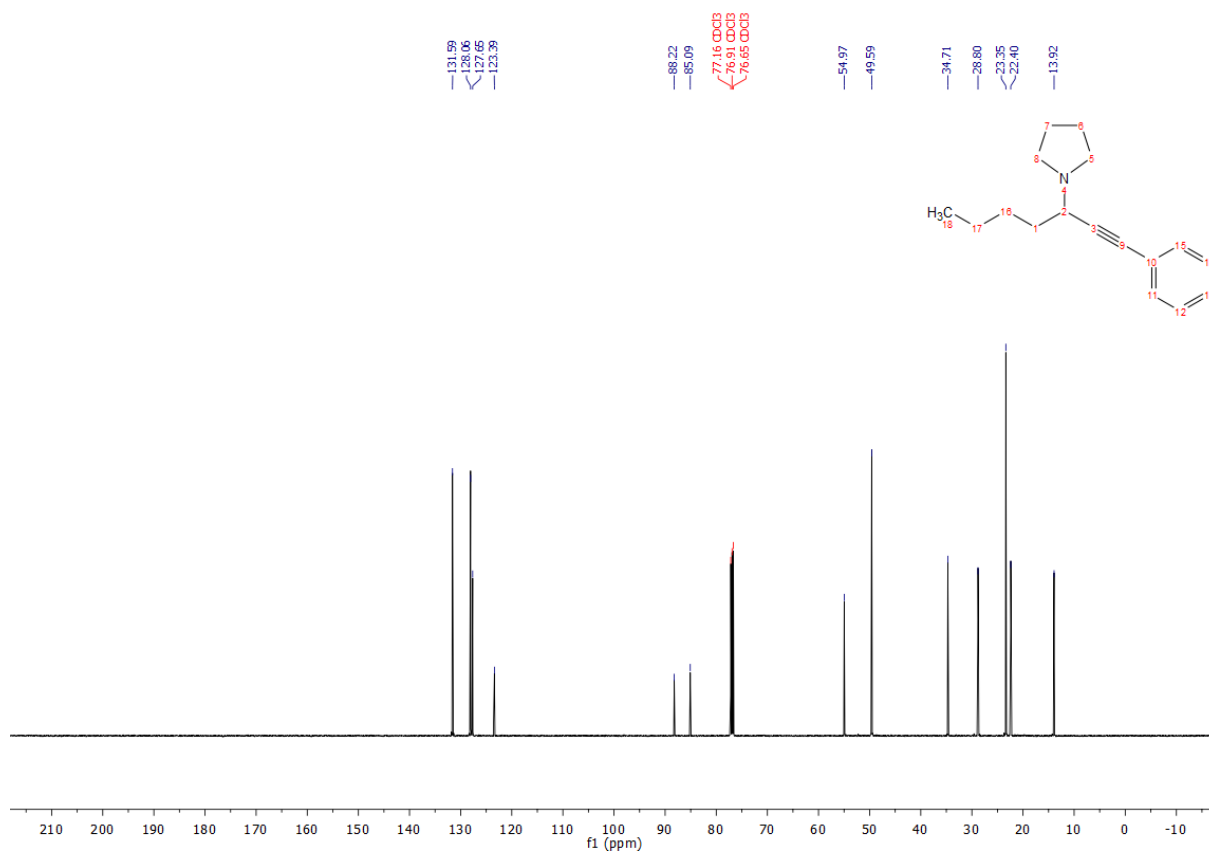

**Figure S15.**  $^1\text{H}$  and  $^{13}\text{C}$  NMR spectra in  $\text{CDCl}_3$  for compound 12.

**Compound 13:**  $^1\text{H}$  NMR (500 MHz, Chloroform- $d$ )  $\delta$ : 7.45 – 7.33 (m, 2H), 7.04 – 6.92 (m, 2H), 3.64 (dd,  $J = 9.1, 5.7$  Hz, 1H), 2.78 – 2.70 (m, 2H), 2.72 – 2.61 (m, 4H), 1.84 – 1.76 (m, 4H), 1.76 – 1.65 (m, 2H), 1.61 – 1.49 (m, 2H), 1.49 – 1.42 (m, 1H), 1.41 – 1.32 (m, 2H), 0.92 (t,  $J = 7.3$  Hz, 3H).  $^{13}\text{C}$  NMR (126 MHz,  $\text{CDCl}_3$ )  $\delta$ : 162.1 (d,  $J = 248.1$  Hz, C), 133.4 (d,  $J = 8.3$  Hz,  $2 \times \text{CH}$ ), 119.5 (C), 115.3 (d,  $J = 22.0$  Hz,  $2 \times \text{CH}$ ), 88.9 (C $\equiv$ C), 84.0 (C $\equiv$ C), 54.9 (CH), 49.6 ( $2 \times \text{CH}_2$ ), 34.7 ( $\text{CH}_2$ ), 28.8 ( $\text{CH}_2$ ), 23.4 ( $2 \times \text{CH}_2$ ), 22.4 ( $\text{CH}_2$ ), 19.9 ( $\text{CH}_3$ ).

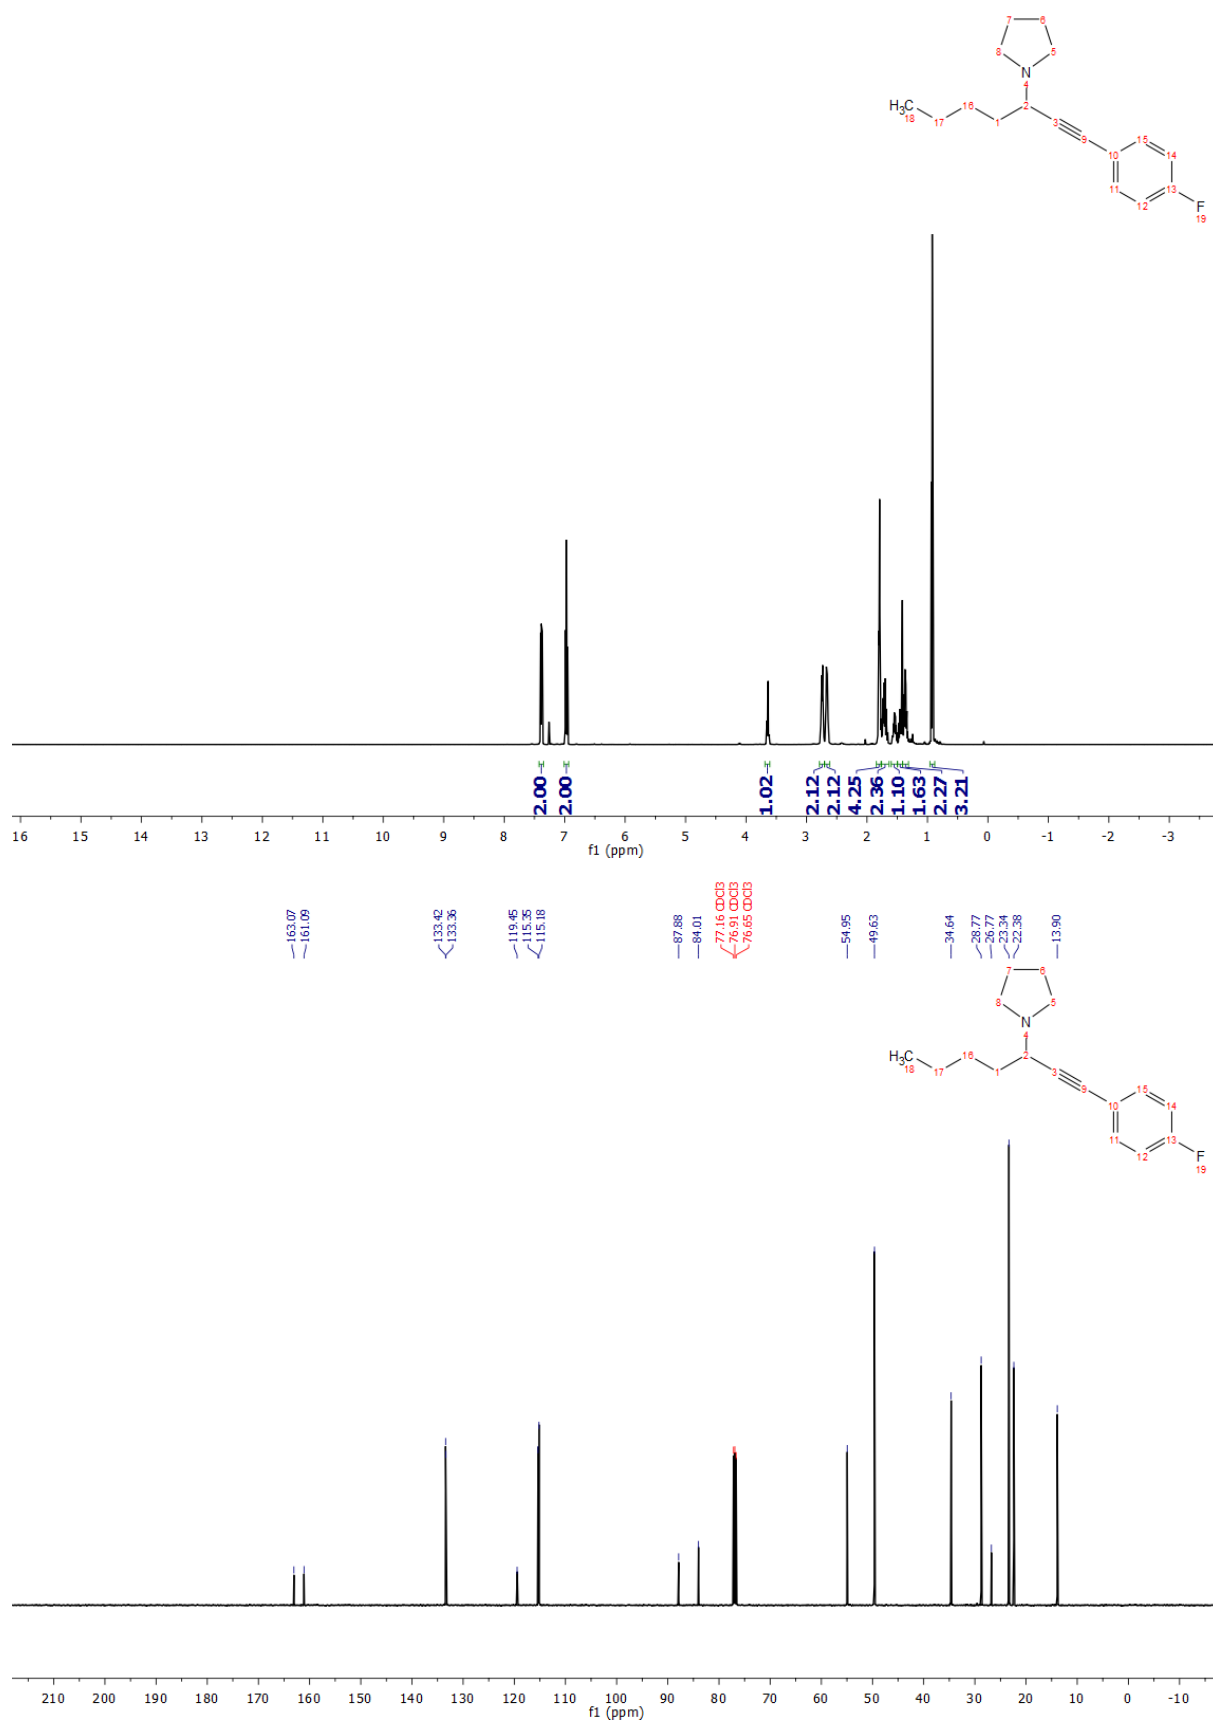

**Figure S16.** <sup>1</sup>H and <sup>13</sup>C NMR spectra in CDCl<sub>3</sub> for compound 13.

**Compound 14:**  $^1\text{H}$  NMR (500 MHz, Chloroform- $d$ )  $\delta$ : 7.43 (dd,  $J = 7.5, 2.2$  Hz, 2H), 7.34 – 7.23 (m, 3H), 3.16 (d,  $J = 10.1$  Hz, 1H), 2.80 (ddd,  $J = 12.2, 6.9, 3.5$  Hz, 2H), 2.57 (dt,  $J = 12.7, 6.0$  Hz, 2H), 2.23 – 2.05 (m, 2H), 1.82 – 1.60 (m, 10H), 1.58 – 1.46 (m, 1H), 1.37 – 1.11 (m, 4H), 0.96 (dq,  $J = 39.3, 12.0, 3.4$  Hz, 2H).  $^{13}\text{C}$  NMR (126 MHz,  $\text{CDCl}_3$ )  $\delta$ : 131.7 (2 $\times$ CH), 128.2 (2 $\times$ CH), 127.6 (CH), 123.9 (C), 88.9 (C $\equiv$ C), 84.9 (C $\equiv$ C), 65.3 (CH), 52.7 (2 $\times$ CH $_2$ ), 40.8 (2 $\times$ CH $_2$ ), 31.2 (CH $_2$ ), 30.6 (CH $_2$ ), 29.3 (CH $_2$ ), 27.2 (2 $\times$ CH $_2$ ), 26.9 (CH $_2$ ), 26.3 (CH $_2$ ), 26.19 (CH $_2$ ).

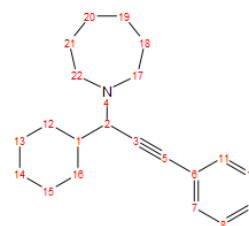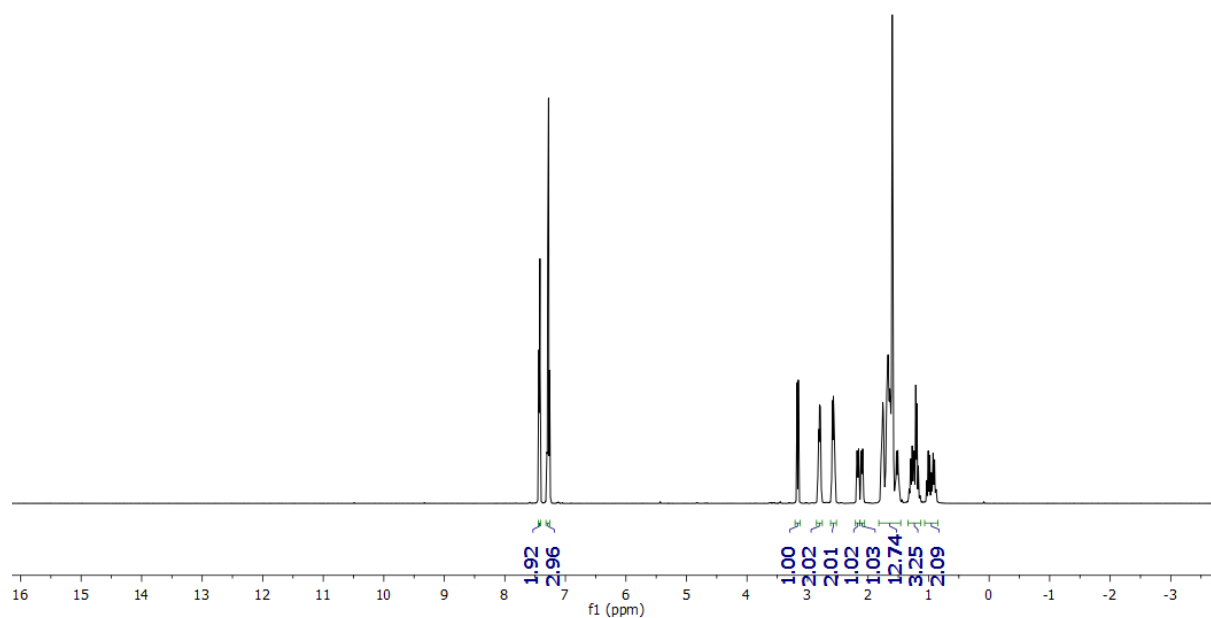

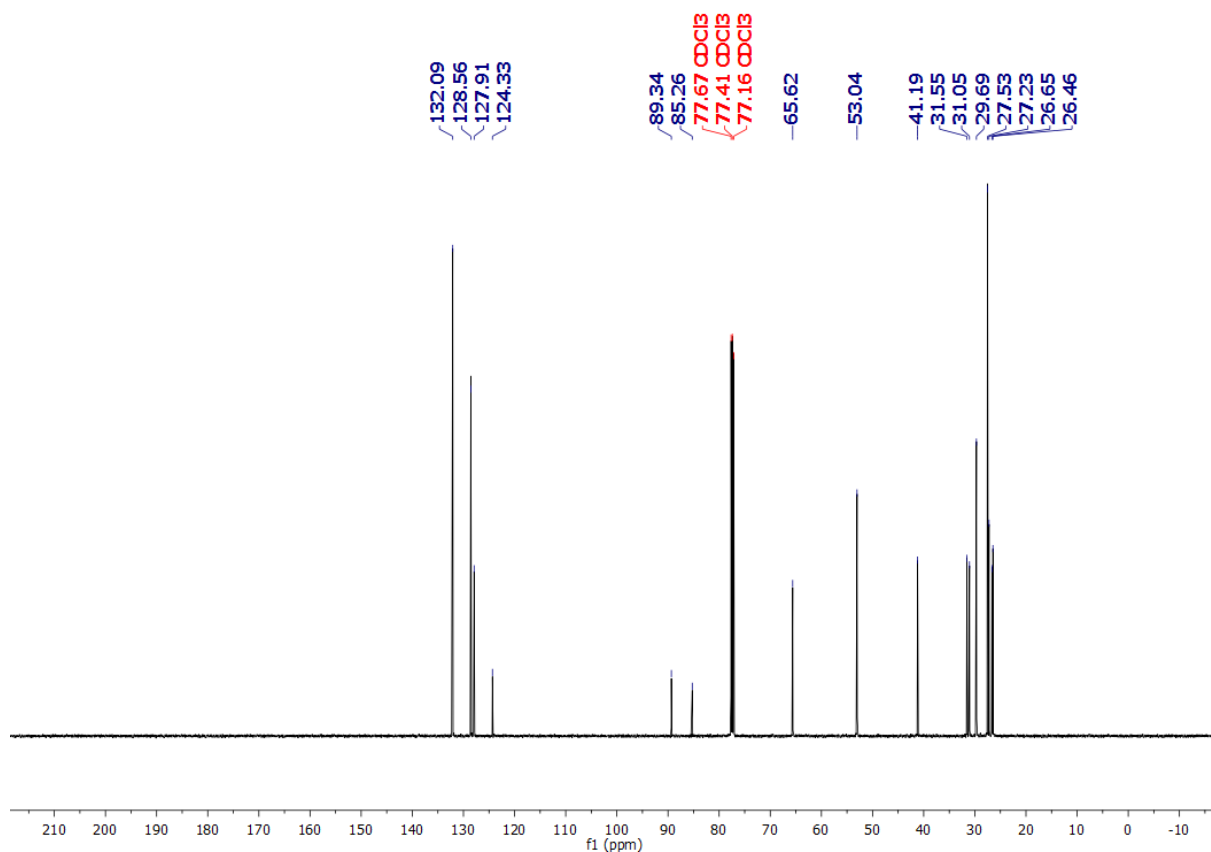

**Figure S17.**  $^1\text{H}$  and  $^{13}\text{C}$  NMR spectra in  $\text{CDCl}_3$  for compound 14.

**Compound 15:**  $^1\text{H}$  NMR (500 MHz, Chloroform- $d$ )  $\delta$ : 7.52 – 7.43 (m, 2H), 7.38 – 7.26 (m, 3H), 3.13 (d,  $J$  = 9.9 Hz, 1H), 2.73 – 2.56 (m, 2H), 2.53 – 2.33 (m, 2H), 2.24 – 1.99 (m, 2H), 1.84 – 1.52 (m, 8H), 1.46 (p,  $J$  = 6.0 Hz, 2H), 1.38 – 1.14 (m, 3H), 1.00 (dq,  $J$  = 46.1, 12.2, 3.5 Hz, 2H).  $^{13}\text{C}$  NMR (126 MHz,  $\text{CDCl}_3$ )  $\delta$ : 132.1 (2 $\times$ CH), 128.2 (2 $\times$ CH), 127.9 (CH), 124.2 (C), 88.2 ( $\text{C}\equiv\text{C}$ ), 86.5 ( $\text{C}\equiv\text{C}$ ), 64.8 (CH), 51.1 (2 $\times$ CH $_2$ ), 49.9 (CH $_2$ ), 31.7 (CH $_2$ ), 30.8 (CH $_2$ ), 27.2 (CH $_2$ ), 26.7 (CH $_2$ ), 26.6 (CH $_2$ ), 26.5 (CH $_2$ ), 25.1 (CH $_2$ ).

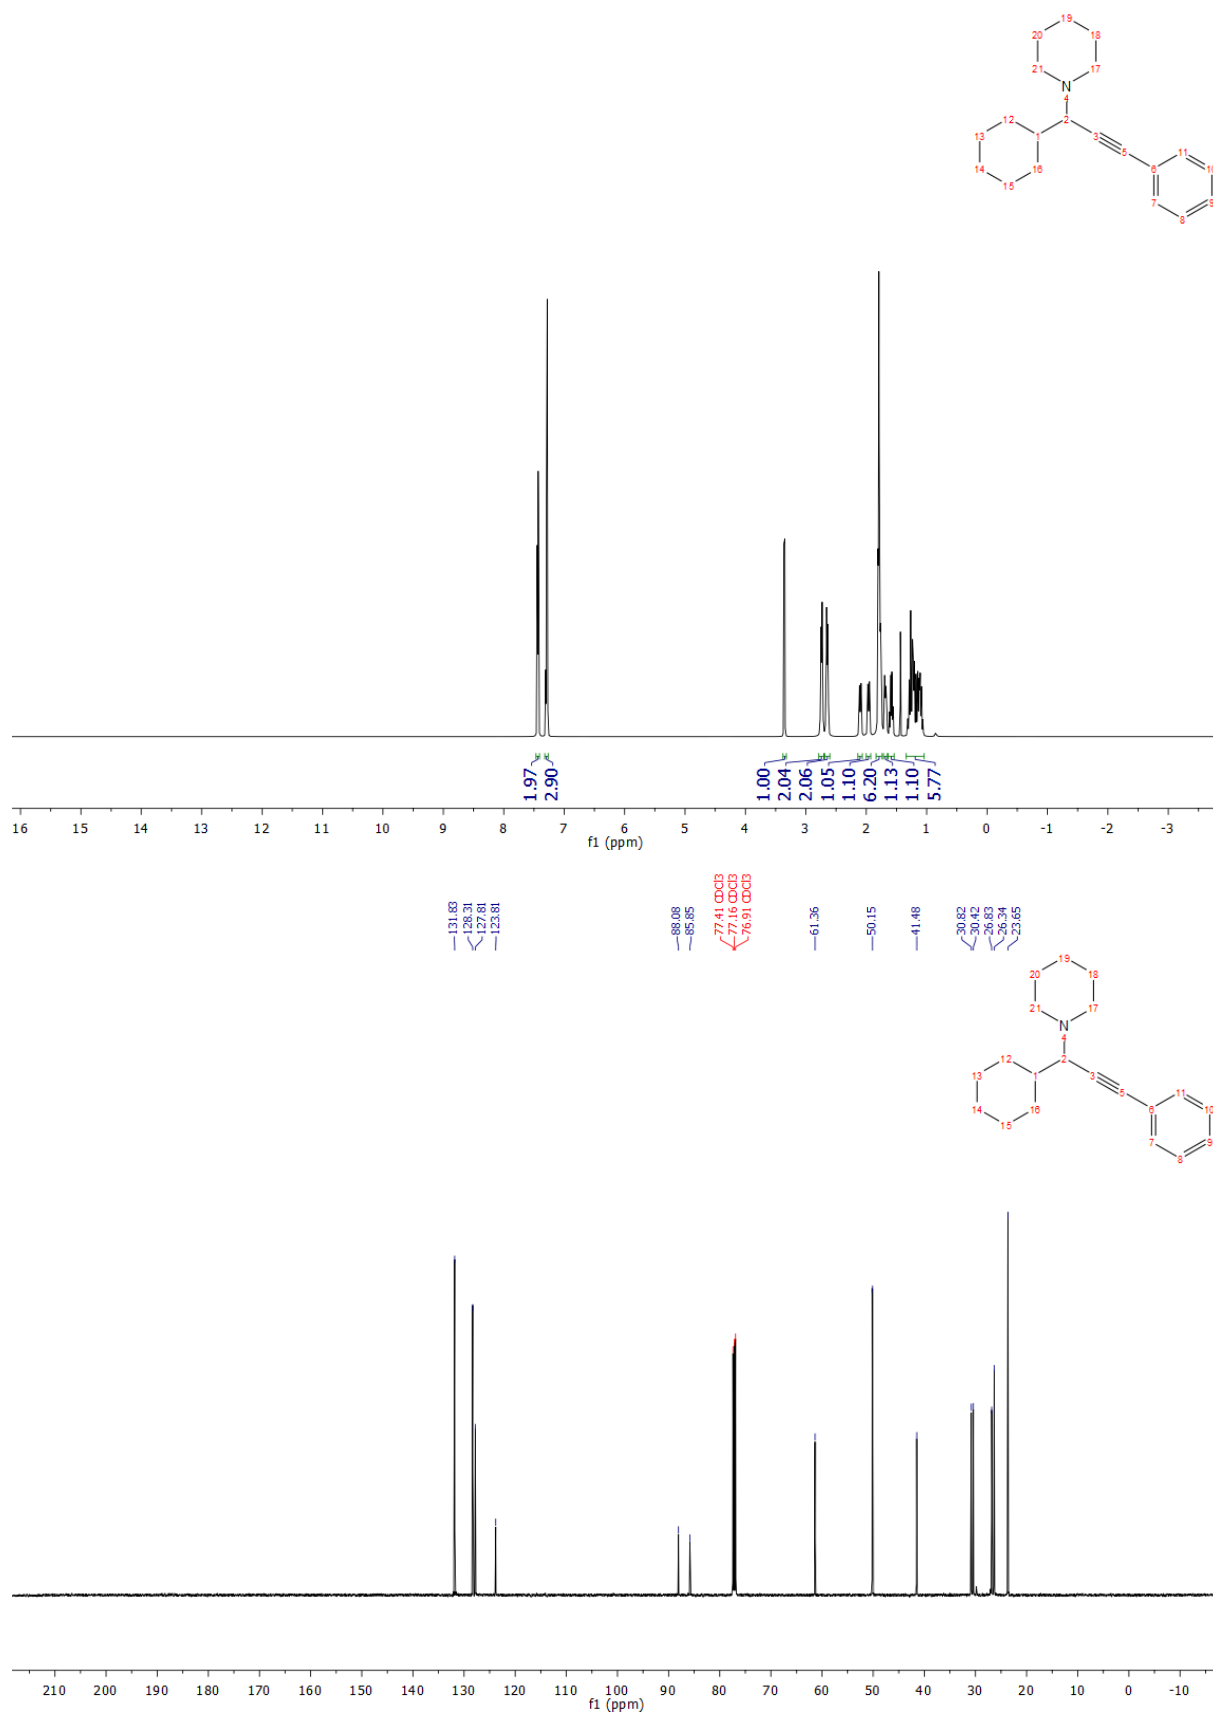

Figure S18. <sup>1</sup>H and <sup>13</sup>C NMR spectra in CDCl<sub>3</sub> for compound 15.

**Compound 16.**  $^1\text{H}$  NMR (500 MHz, Chloroform- $d$ )  $\delta$ : 7.50 – 7.37 (m, 2H), 7.37 – 7.22 (m, 4H), 3.37 (d,  $J$  = 8.4 Hz, 1H), 2.75 (tq,  $J$  = 6.5, 4.2, 3.5 Hz, 2H), 2.65 (qt,  $J$  = 7.6, 4.3 Hz, 2H), 2.10 (d,  $J$  = 13.3 Hz, 1H), 1.96 (d,  $J$  = 13.1 Hz, 1H), 1.85 – 1.73 (m, 6H), 1.73 – 1.64 (m, 1H), 1.66 – 1.53 (m, 1H), 1.35 – 1.02 (m, 5H).  $^{13}\text{C}$  NMR (126 MHz,  $\text{CDCl}_3$ )  $\delta$ : 132.1 (2 $\times$ CH), 128.6 (2 $\times$ CH), 128.1 (CH), 124.0 (C), 88.2 (C $\equiv$ C), 86.2 (C $\equiv$ C), 61.6 ( $\times$ CH), 50.4 (2 $\times$ CH $_2$ ), 41.7 (CH $_2$ ), 31.1 (CH $_2$ ), 30.7 (CH $_2$ ), 27.1 (CH $_2$ ), 26.6 (CH $_2$ ), 23.9 (2 $\times$ CH $_2$ ).

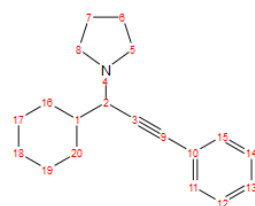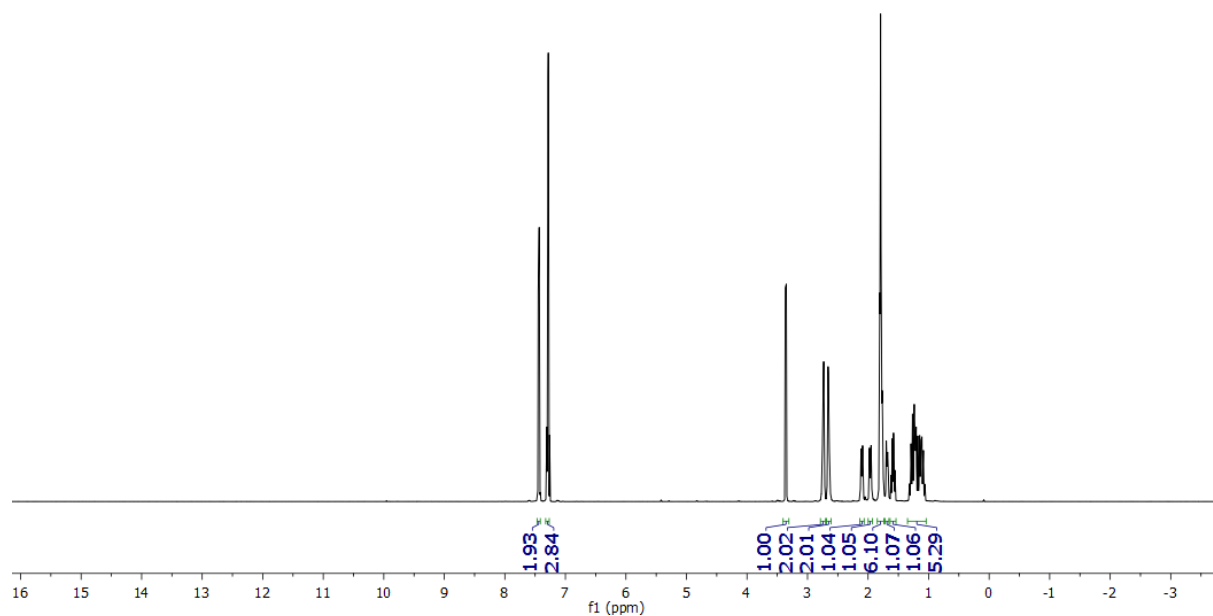



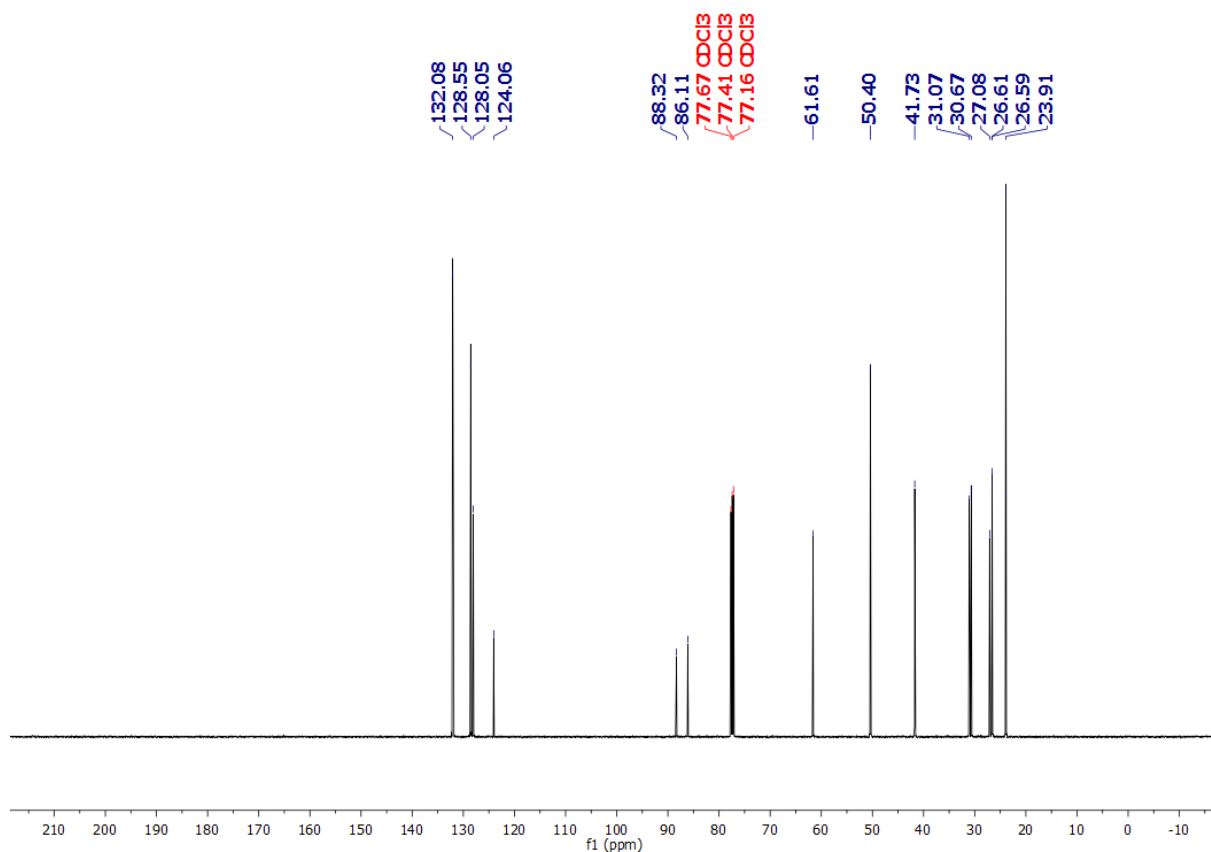

**Figure S19.**  $^1\text{H}$  and  $^{13}\text{C}$  NMR spectra in  $\text{CDCl}_3$  for compound 16.

**Compound 17.**  $^1\text{H}$  NMR (500 MHz, Chloroform- $d$ )  $\delta$ : 7.47 – 7.40 (m, 2H), 7.34 – 7.25 (m, 3H), 3.82 – 3.68 (m, 4H), 3.13 (d,  $J$  = 9.8 Hz, 1H), 2.71 (ddd,  $J$  = 11.6, 6.2, 3.3 Hz, 2H), 2.52 (ddd,  $J$  = 11.3, 6.2, 3.3 Hz, 2H), 2.15 – 2.02 (m, 2H), 1.82 – 1.54 (m, 4H), 1.37 – 1.13 (m, 3H), 1.12 – 0.91 (m, 2H).  $^{13}\text{C}$  NMR (126 MHz,  $\text{CDCl}_3$ )  $\delta$ : 131.8 (2 $\times$ CH), 128.3 (2 $\times$ CH), 127.9 (CH), 123.5 (C), 86.9 ( $\text{C}\equiv\text{C}$ ), 86.7 ( $\text{C}\equiv\text{C}$ ), 67.3 (2 $\times$ CH $_2$ ), 64.0 (CH), 49.9 (2 $\times$ CH $_2$ ), 39.2 (2 $\times$ CH $_2$ ), 31.1 (2 $\times$ CH $_2$ ), 30.5 (2 $\times$ CH $_2$ ), 26.8 (2 $\times$ CH $_2$ ), 26.3 (2 $\times$ CH $_2$ ), 26.1 (2 $\times$ CH $_2$ ).

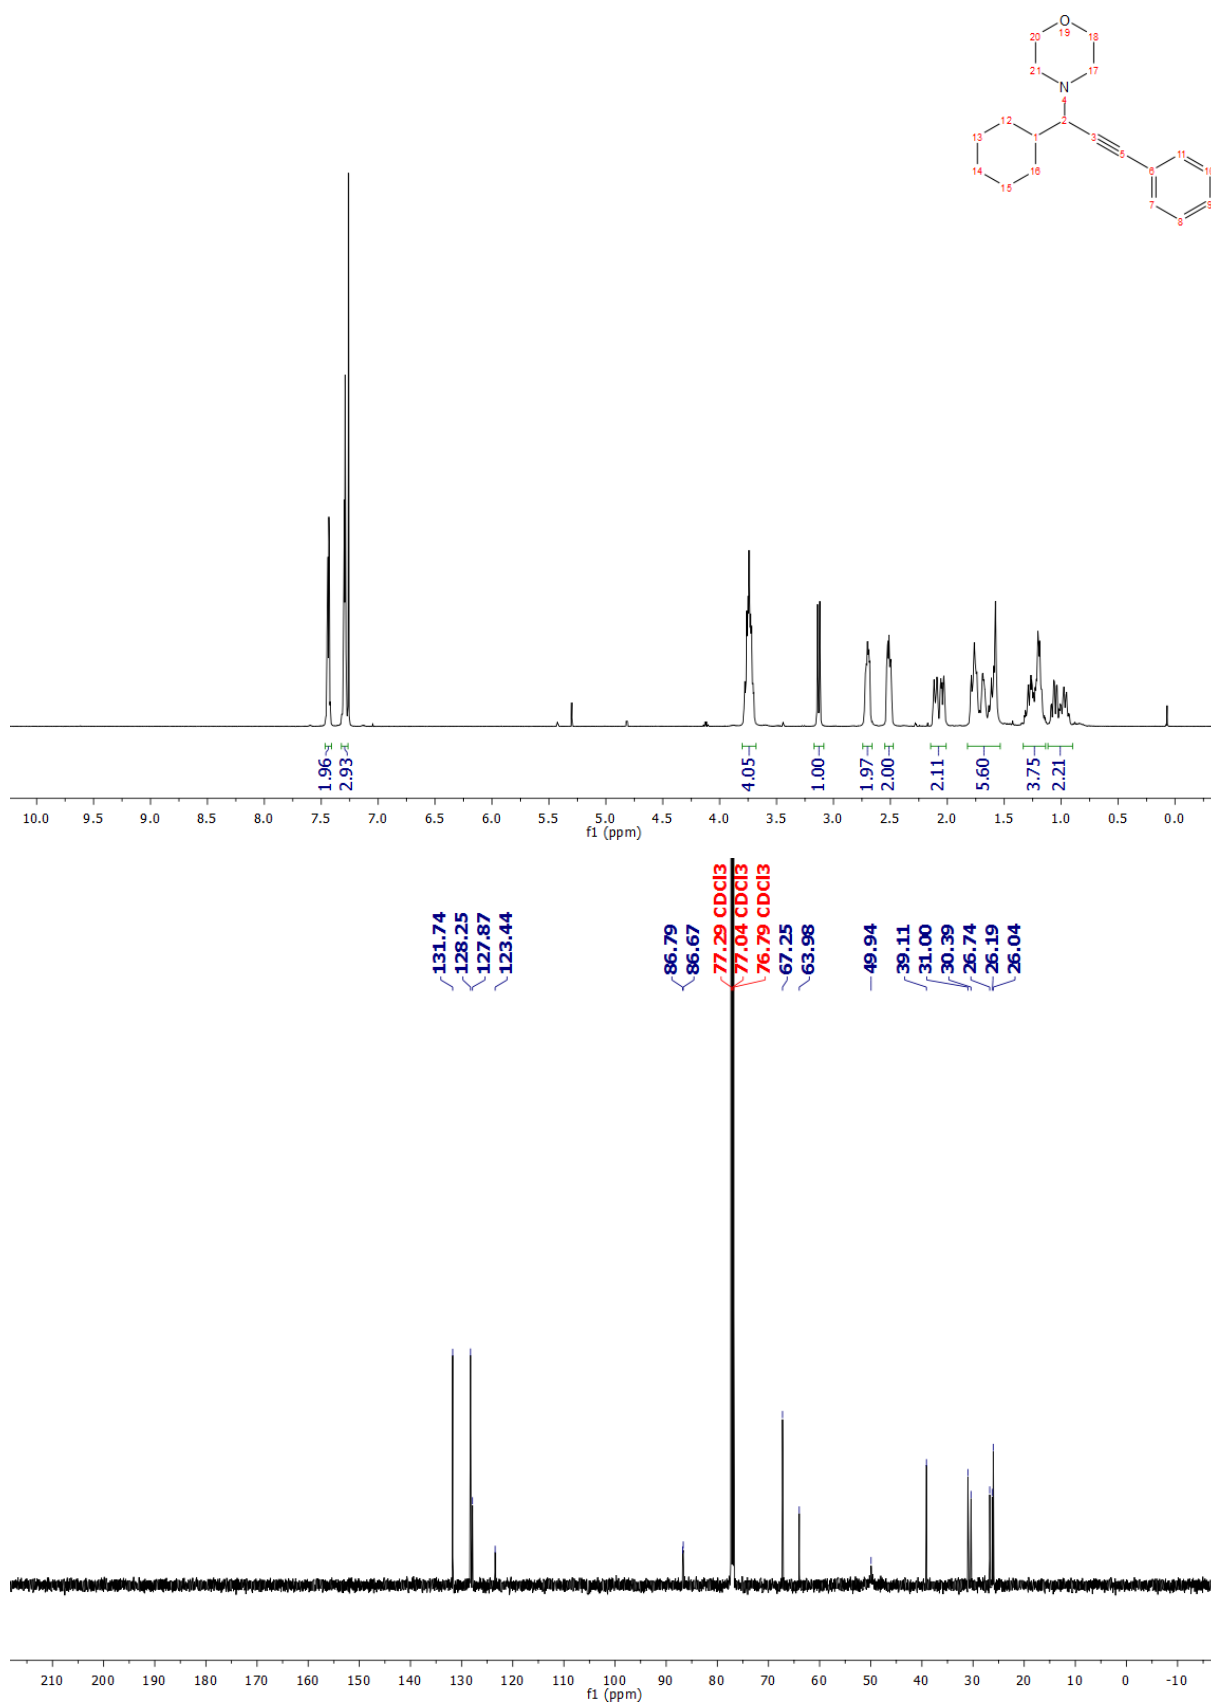

Figure S20. <sup>1</sup>H and <sup>13</sup>C NMR spectra in CDCl<sub>3</sub> for compound 17.

**Compound 18:**  $^1\text{H}$  NMR (500 MHz, Chloroform- $d$ )  $\delta$ : 7.48 – 7.40 (m, 2H), 7.35 – 7.25 (m, 3H), 3.21 (d,  $J$  = 10.1 Hz, 1H), 2.85 (ddd,  $J$  = 10.8, 5.9, 2.9 Hz, 2H), 2.60 (ddd,  $J$  = 12.6, 7.7, 4.3 Hz, 2H), 2.19 (dp,  $J$  = 10.0, 7.6 Hz, 1H), 1.95 – 1.85 (m, 1H), 1.84 – 1.75 (m, 1H), 1.74 – 1.50 (m, 13H), 1.46 (dq,  $J$  = 12.7, 7.7 Hz, 1H).  $^{13}\text{C}$  NMR (126 MHz,  $\text{CDCl}_3$ )  $\delta$ : 132.1 (2 $\times$ CH), 128.5 (2 $\times$ CH), 127.9 (CH), 124.3 (C), 89.9 ( $\text{C}\equiv\text{C}$ ), 84.3 ( $\text{C}\equiv\text{C}$ ), 64.7 (CH), 52.8 (2 $\times$  $\text{CH}_2$ ), 43.9 ( $\text{CH}_2$ ), 31.2 ( $\text{CH}_2$ ), 30.8 ( $\text{CH}_2$ ), 29.7 (2 $\times$  $\text{CH}_2$ ), 27.5 (2 $\times$  $\text{CH}_2$ ), 25.9 ( $\text{CH}_2$ ), 25.7 ( $\text{CH}_2$ ).

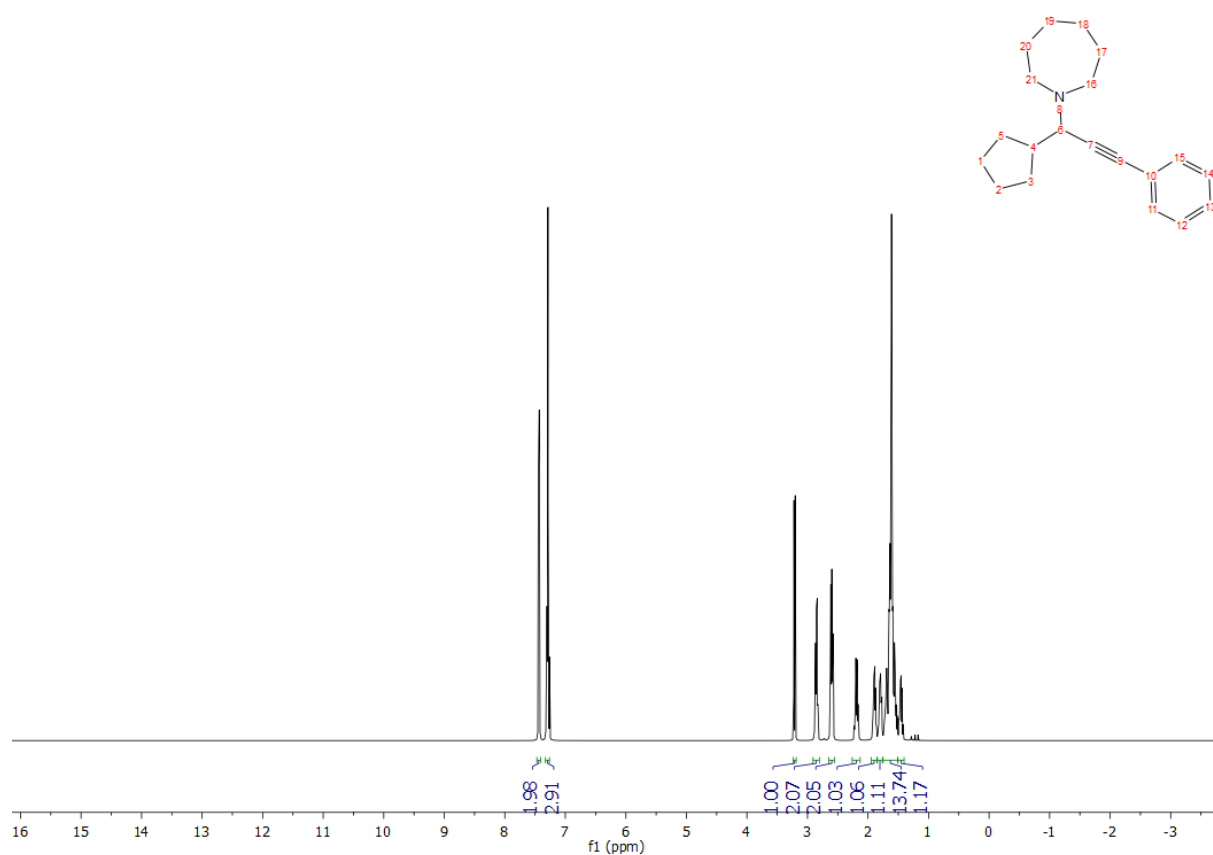

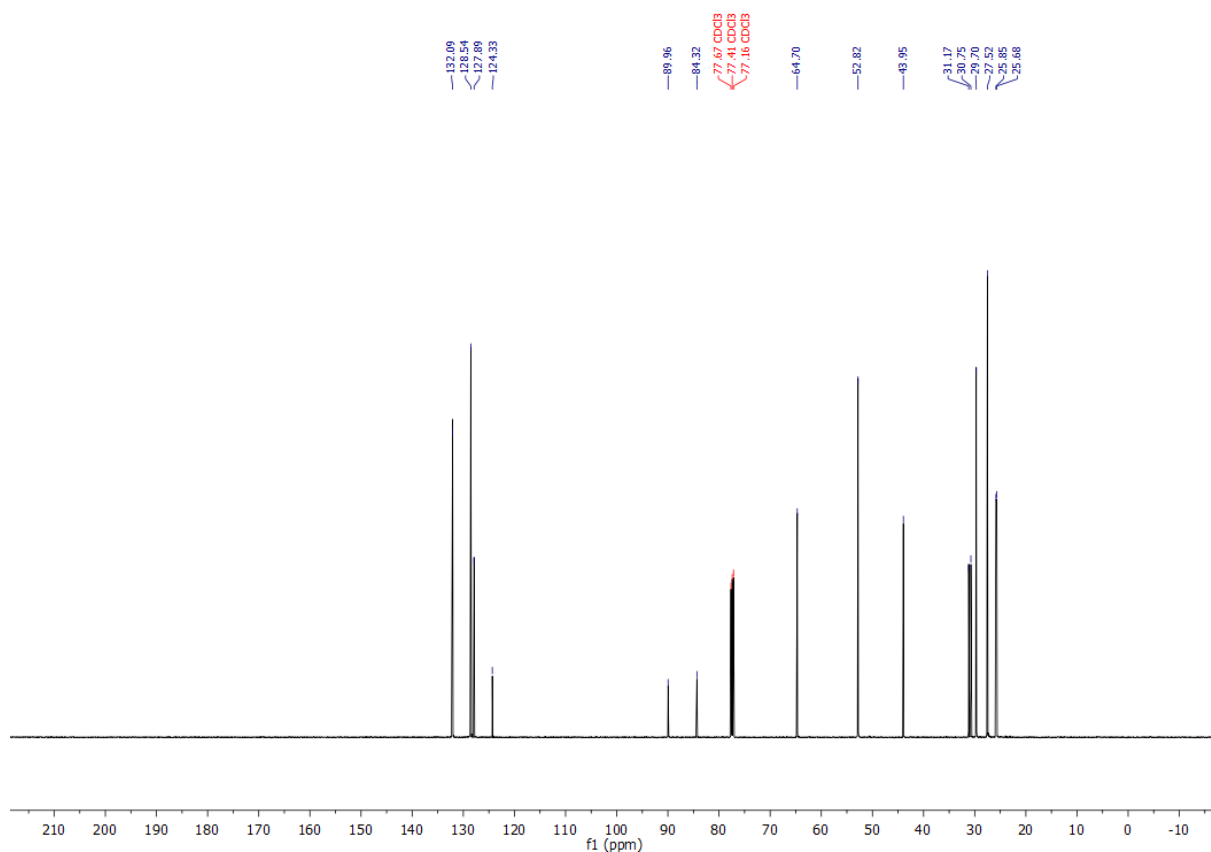

**Figure S21.**  $^1\text{H}$  and  $^{13}\text{C}$  NMR spectra in  $\text{CDCl}_3$  for compound 18.

**Compound 19.**  $^1\text{H}$  NMR (500 MHz, Chloroform- $d$ )  $\delta$ : 7.41 – 7.32 (m, 2H), 6.85 – 6.77 (m, 2H), 3.80 (s, 3H), 3.32 (d,  $J$  = 8.4 Hz, 1H), 2.77-2.66 (m, 2H), 2.69-2.59 (m, 2H), 2.15-2.02 (m, 1H), 1.99-1.90 (m, 1H), 1.84 – 1.71 (m, 6H), 1.70 – 1.64 (m, 1H), 1.56(tdt,  $J$  = 11.6, 8.4, 3.4 Hz, 1H), 1.34 – 1.04 (m, 5H).  $^{13}\text{C}$  NMR (126 MHz,  $\text{CDCl}_3$ )  $\delta$ : 159.5 (C), 133.4 (2 $\times$ CH), 116.2 (CH), 114.2 (2 $\times$ CH), 86.6 ( $\text{C}\equiv\text{C}$ ), 85.8 ( $\text{C}\equiv\text{C}$ ), 61.6 (CH), 55.6 ( $\text{CH}_2$ ), 50.4 ( $\text{CH}_2$ ), 41.7 ( $\text{CH}_2$ ), 32.2 ( $\text{CH}_2$ ), 31.9 ( $\text{CH}_2$ ), 27.1 ( $\text{CH}_2$ ), 26.6 (2 $\times$  $\text{CH}_2$ ), 23.9 (2 $\times$  $\text{CH}_2$ ).

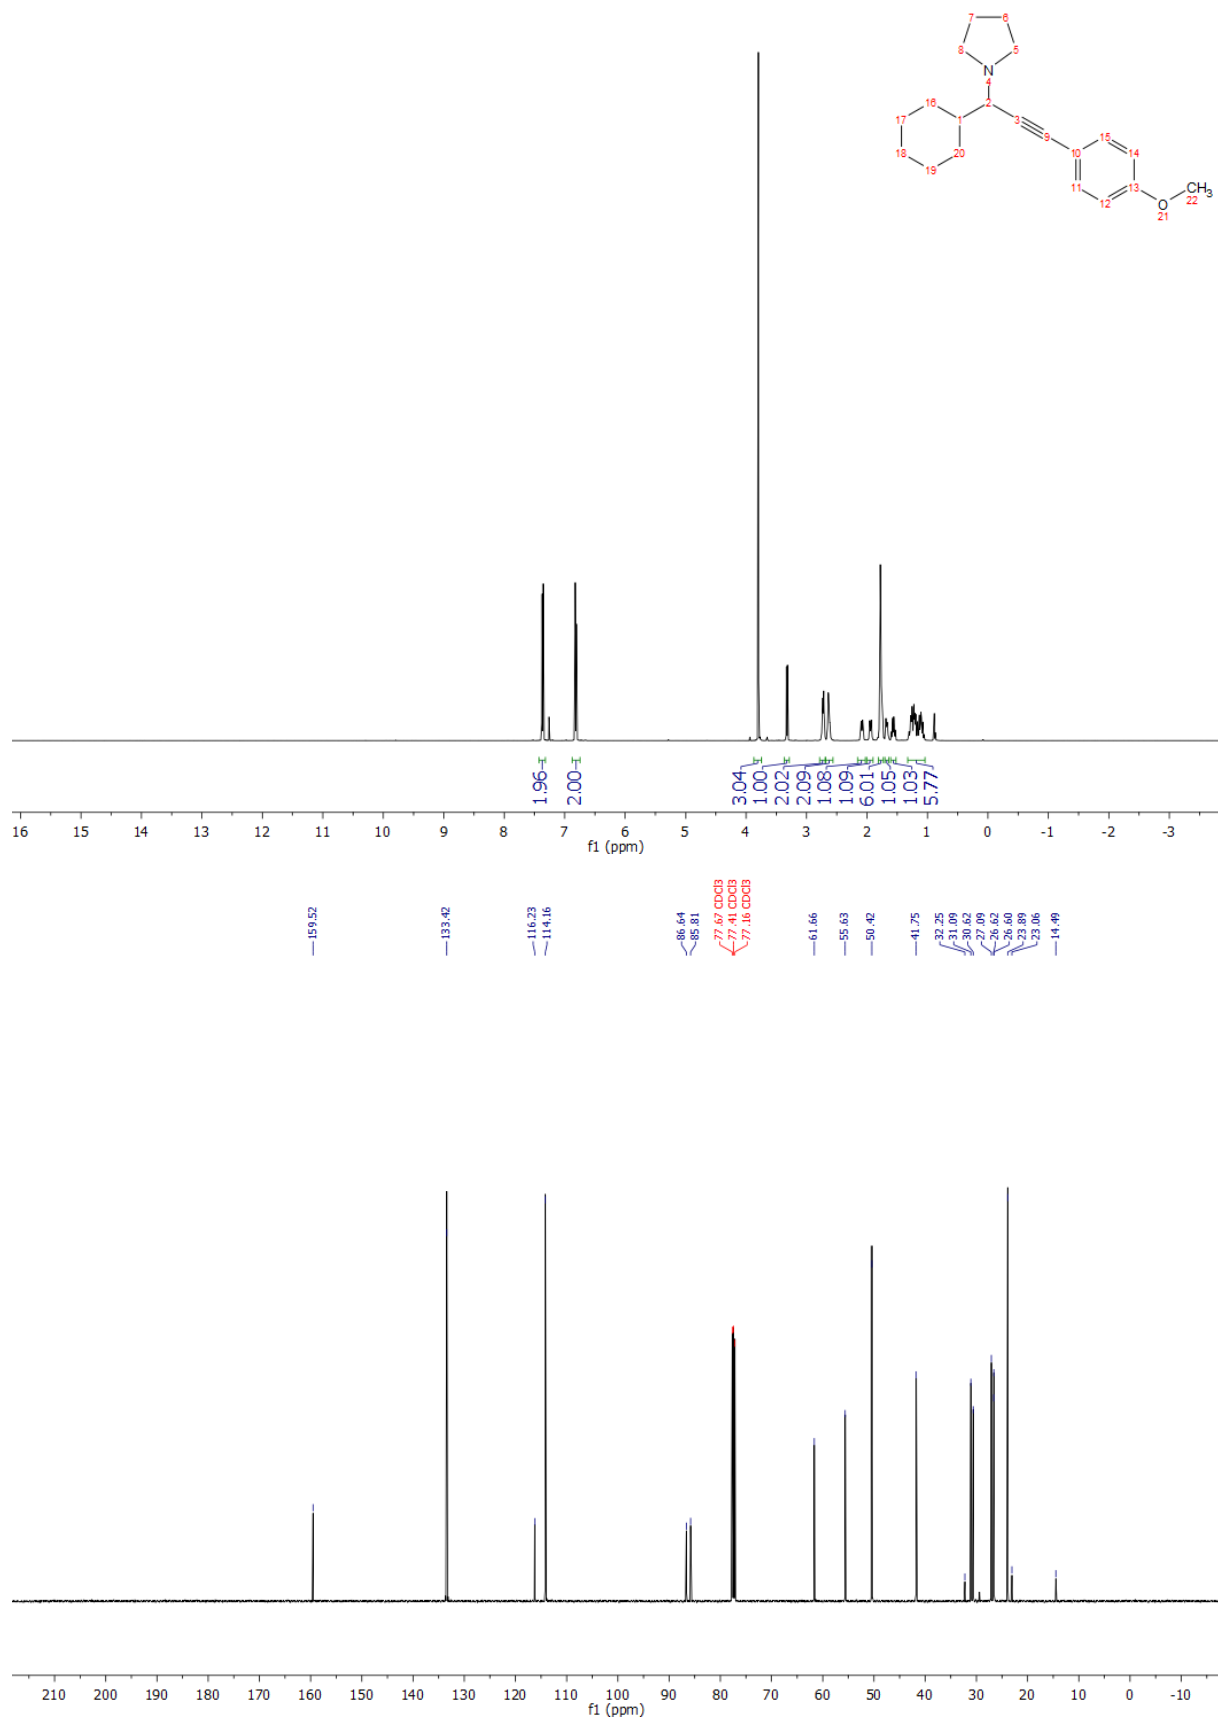

Figure S22.  $^1\text{H}$  and  $^{13}\text{C}$  NMR spectra in  $\text{CDCl}_3$  for compound 19.

**Compound 20.**  $^1\text{H}$  NMR (500 MHz, Chloroform- $d$ )  $\delta$ : 7.38 (d,  $J$  = 7.2 Hz, 2H), 7.33 (dd,  $J$  = 8.5, 6.8 Hz, 2H), 7.26 – 7.22 (m, 1H), 3.68 (d,  $J$  = 2.8 Hz, 2H), 2.11-2.02 (m, 1H), 1.95-1.88 (m, 1H), 1.83-1.72 (m, 4H), 1.72-1.65 (m, 1H), 1.53 (tdt,  $J$  = 11.5, 8.2, 3.5 Hz, 1H), 1.33 – 1.04 (m, 5H).  $^{13}\text{C}$  NMR (126 MHz,  $\text{CDCl}_3$ )  $\delta$ : 137.6 (C), 128.5 (2 $\times$ CH), 127.9 (2 $\times$ CH), 126.5 (CH), 82.8 ( $\text{C}\equiv\text{C}$ ), 80.4 ( $\text{C}\equiv\text{C}$ ), 61.1 ( $\text{CH}_2$ ), 50.2 (2 $\times$  $\text{CH}_2$ ), 41.4 ( $\text{CH}_2$ ), 30.8 ( $\text{CH}_2$ ), 30.2 ( $\text{CH}_2$ ), 26.8 ( $\text{CH}_2$ ), 26.4 ( $\text{CH}_2$ ), 26.3 ( $\text{CH}_2$ ), 25.2 ( $\text{CH}_2$ ), 23.6 (2 $\times$  $\text{CH}_2$ ).

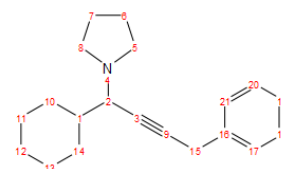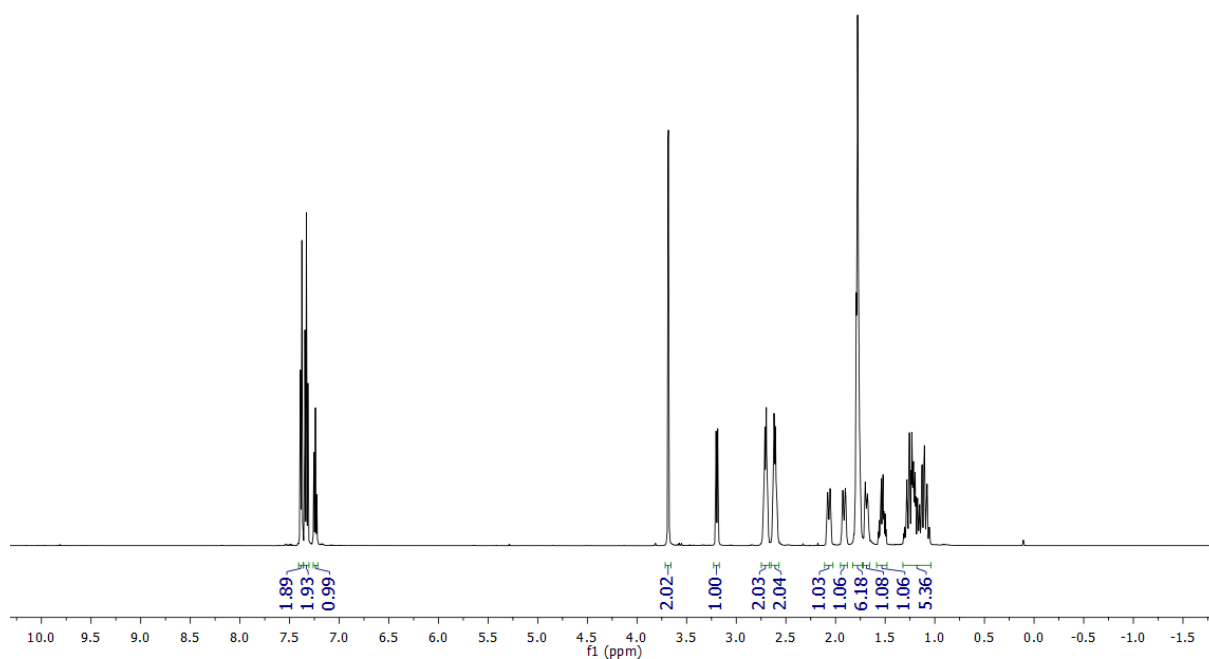

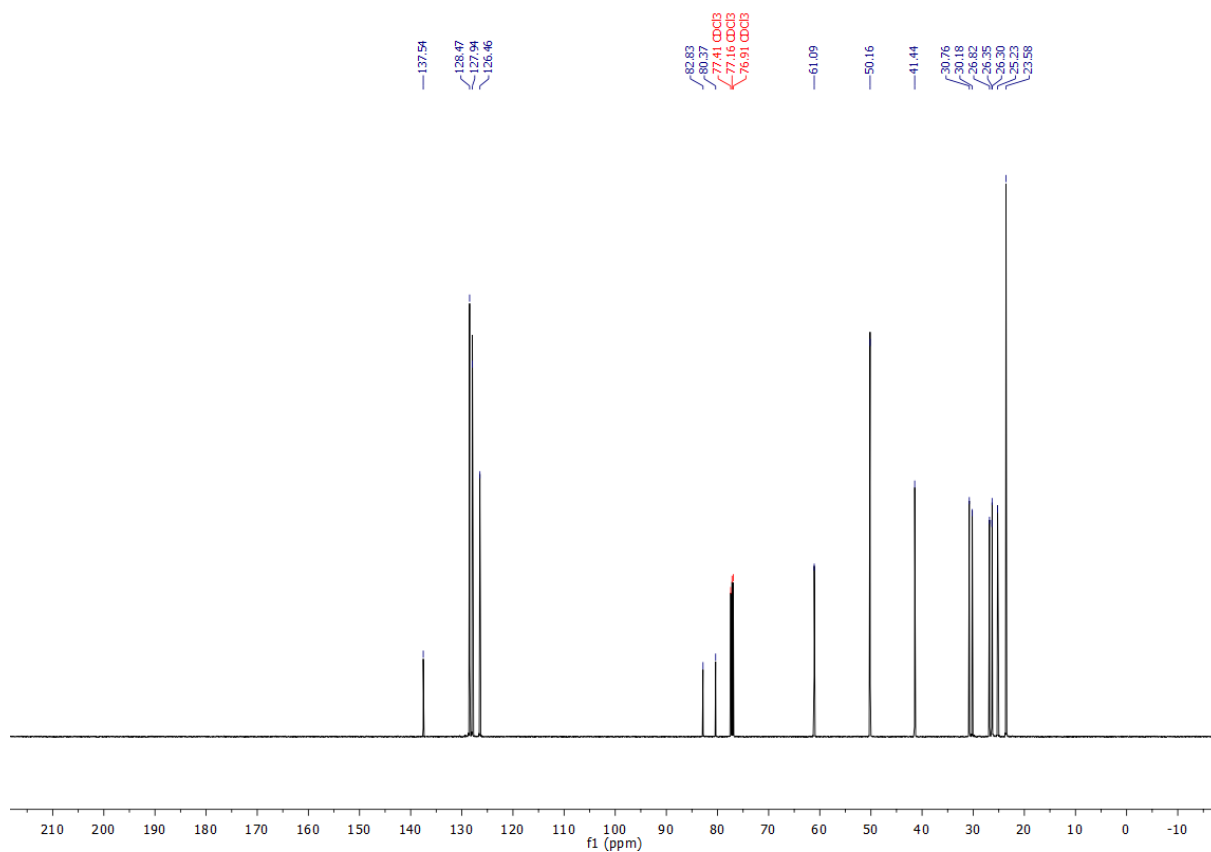

**Figure S23.**  $^1\text{H}$  and  $^{13}\text{C}$  NMR spectra in  $\text{CDCl}_3$  for compound 20.

**Compound 21.**  $^1\text{H}$  NMR (500 MHz, Chloroform- $d$ )  $\delta$ : 3.03 (d,  $J = 7.9$  Hz, 1H), 2.66-2.56 (m, 2H), 2.56-2.48 (m, 2H), 1.99-1.90 (m, 1H), 1.86-1.79 (m, 1H), 1.79 – 1.69 (m, 6H), 1.68 – 1.63 (m, 1H), 1.42 (tdt,  $J = 11.3, 7.9, 3.4$  Hz, 1H), 1.21 (s, 9H), 1.23-1.44 (m, 2H), 1.09 – 0.97 (m, 2H).  $^{13}\text{C}$  NMR (126 MHz,  $\text{CDCl}_3$ )  $\delta$ : 94.6 ( $\text{C}\equiv\text{C}$ ), 76.3 ( $\text{C}\equiv\text{C}$ ), 61.3 ( $\text{CH}_2$ ), 50.5 ( $2\times\text{CH}_2$ ), 41.7 ( $\text{CH}_2$ ), 31.9 ( $3\times\text{CH}_3$ ), 31.1 ( $\text{CH}_2$ ), 30.7 ( $\text{CH}_2$ ), 27.9 ( $\text{CH}_2$ ), 27.2 ( $\text{CH}_2$ ), 26.7 ( $\text{CH}_2$ ), 26.6 ( $\text{CH}_2$ ), 23.8 ( $2\times\text{CH}_2$ ).

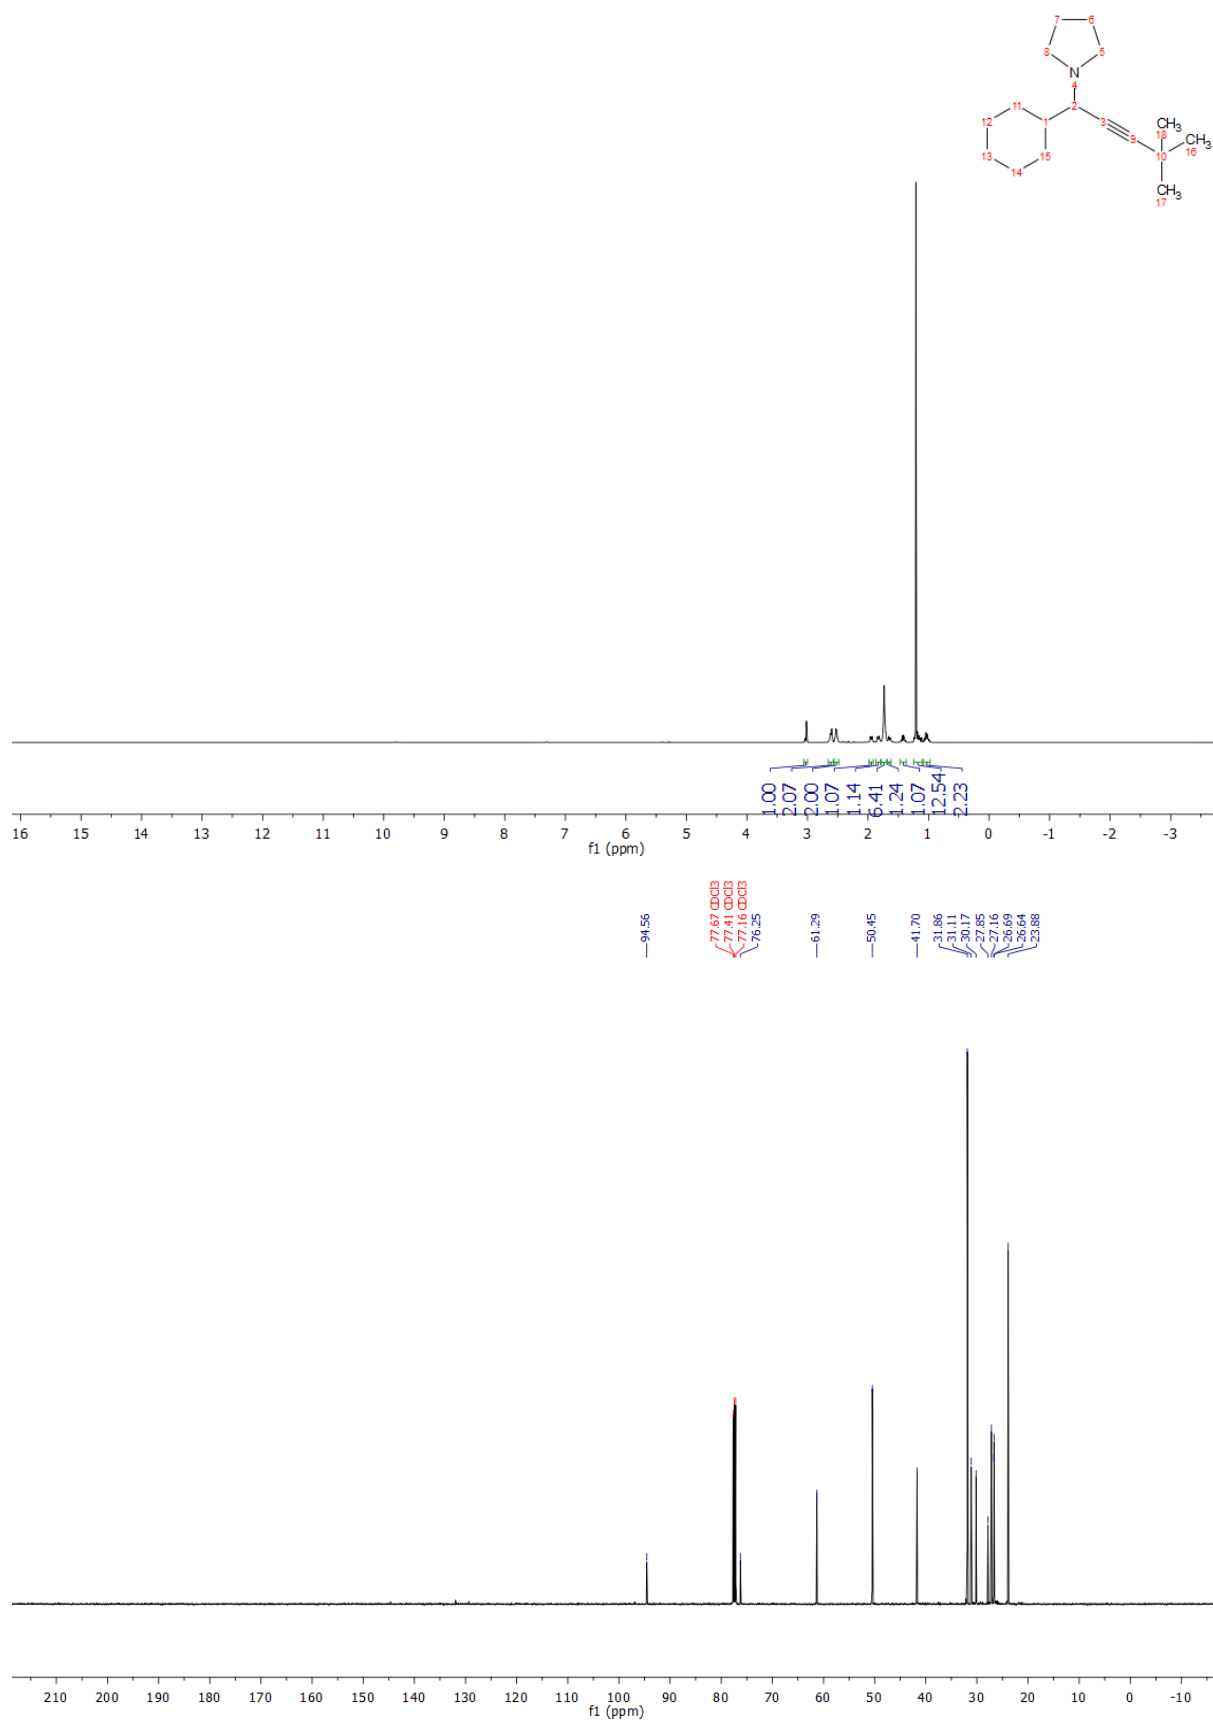

**Figure S24.** <sup>1</sup>H and <sup>13</sup>C NMR spectra in CDCl<sub>3</sub> for compound 21.



**Compound 22.**  $^1\text{H}$  NMR (500 MHz, Chloroform- $d$ )  $\delta$ : 3.04 (dt,  $J = 8.0, 2.1$  Hz, 1H), 2.65-2.58 (m, 2H), 2.56-2.49 (m, 2H), 2.19 (td,  $J = 6.9, 2.1$  Hz, 2H), 2.00-1.92 (m, 1H), 1.88-1.79 (m, 1H), 1.78 – 1.68 (m, 6H), 1.68 – 1.59 (m, 1H), 1.53 – 1.35 (m, 5H), 1.29 – 0.97 (m, 5H), 0.89 (t,  $J = 7.2$  Hz, 3H).  $^{13}\text{C}$  NMR (126 MHz,  $\text{CDCl}_3$ )  $\delta$ : 85.6 ( $\text{C}\equiv\text{C}$ ), 77.8 ( $\text{C}\equiv\text{C}$ ), 61.1 ( $\text{CH}_2$ ), 50.2 ( $2\times\text{CH}_2$ ), 41.5 ( $\text{CH}_2$ ), 31.4 ( $\text{CH}_2$ ), 30.8 ( $\text{CH}_2$ ), 30.0 ( $\text{CH}_2$ ), 26.8 ( $\text{CH}_2$ ), 26.4 ( $\text{CH}_2$ ), 26.3 ( $\text{CH}_2$ ), 23.6 ( $2\times\text{CH}_2$ ), 22.1 ( $\text{CH}_2$ ), 18.5 ( $\text{CH}_2$ ) 13.7 ( $\text{CH}_3$ ).

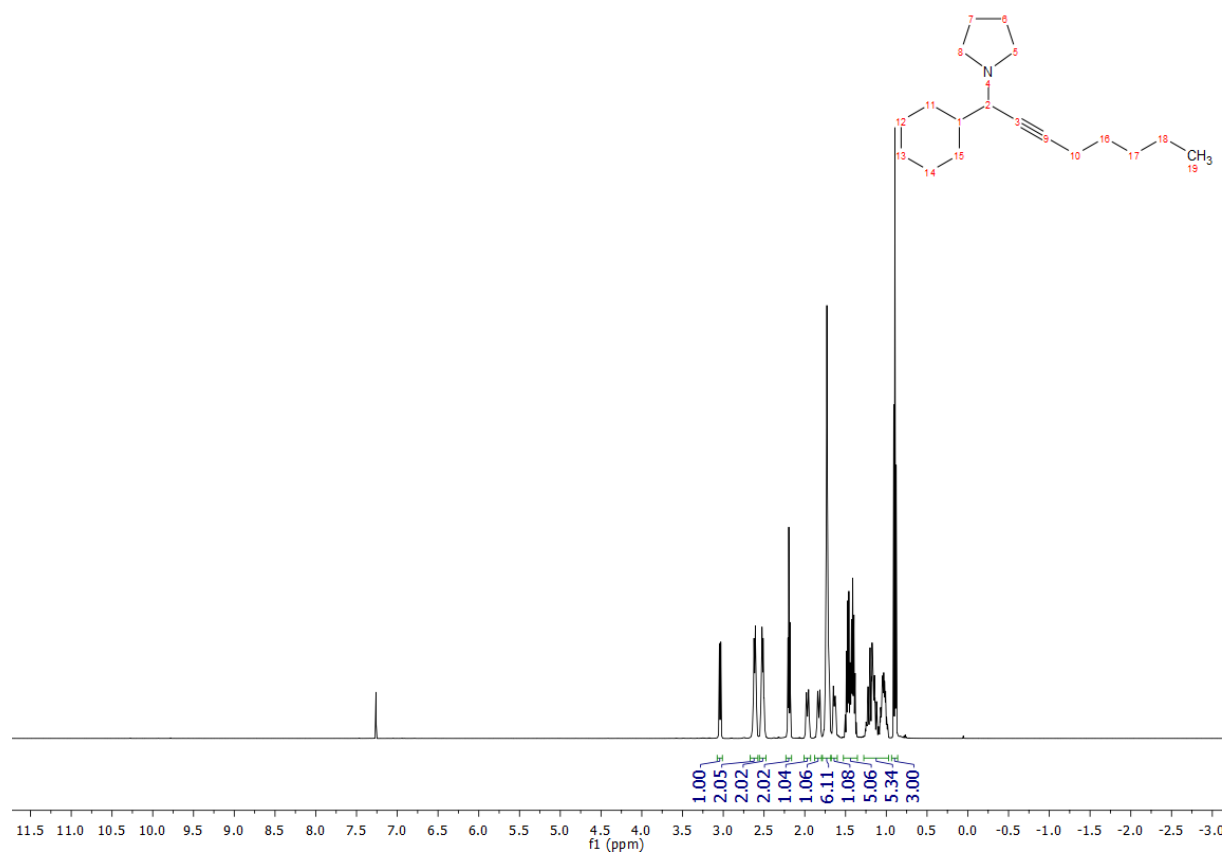

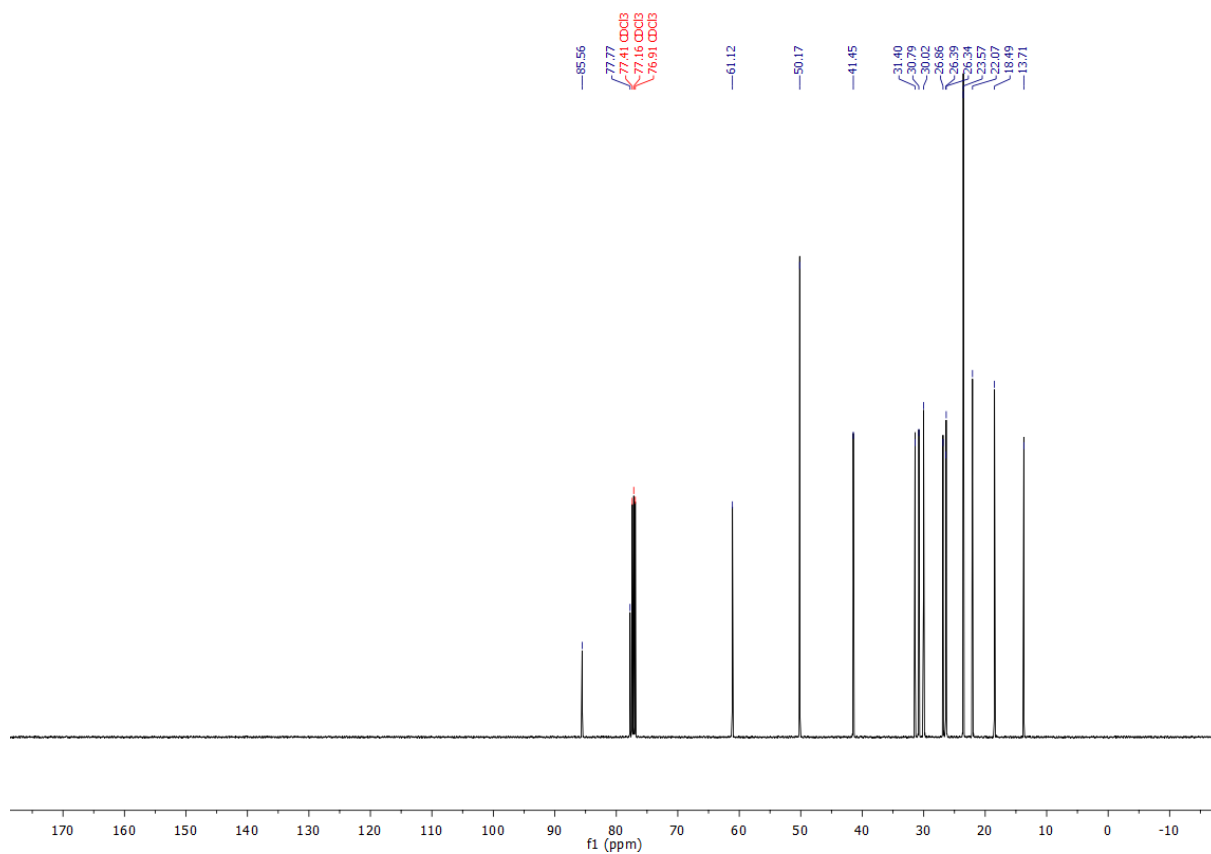

**Figure S25.**  $^1\text{H}$  and  $^{13}\text{C}$  NMR spectra in  $\text{CDCl}_3$  for compound 22.

**Compound 23:**  $^1\text{H}$  NMR (500 MHz, Chloroform-d)  $\delta$ : 7.63 – 7.61 (m, 2H), 7.52 – 7.49 (m, 2H), 7.39 – 7.29 (m, 6H), 4.95 (s, 1H), 2.74 – 2.67 (m, 4H), 1.85 – 1.76 (m, 4H).  $^{13}\text{C}$  NMR (126 MHz,  $\text{CDCl}_3$ )  $\delta$ : 139.6 (C), 131.8 (2 $\times$ CH), 128.3 (4 $\times$ CH), 128.1 (2 $\times$ CH), 127.6 (2 $\times$ CH), 123.3 (CH), 86.9 (C $\equiv$ C), 86.7 (C $\equiv$ C), 59.2 (CH), 50.3 (2 $\times$  CH $_2$ ), 23.5 (2 $\times$ CH $_2$ ).

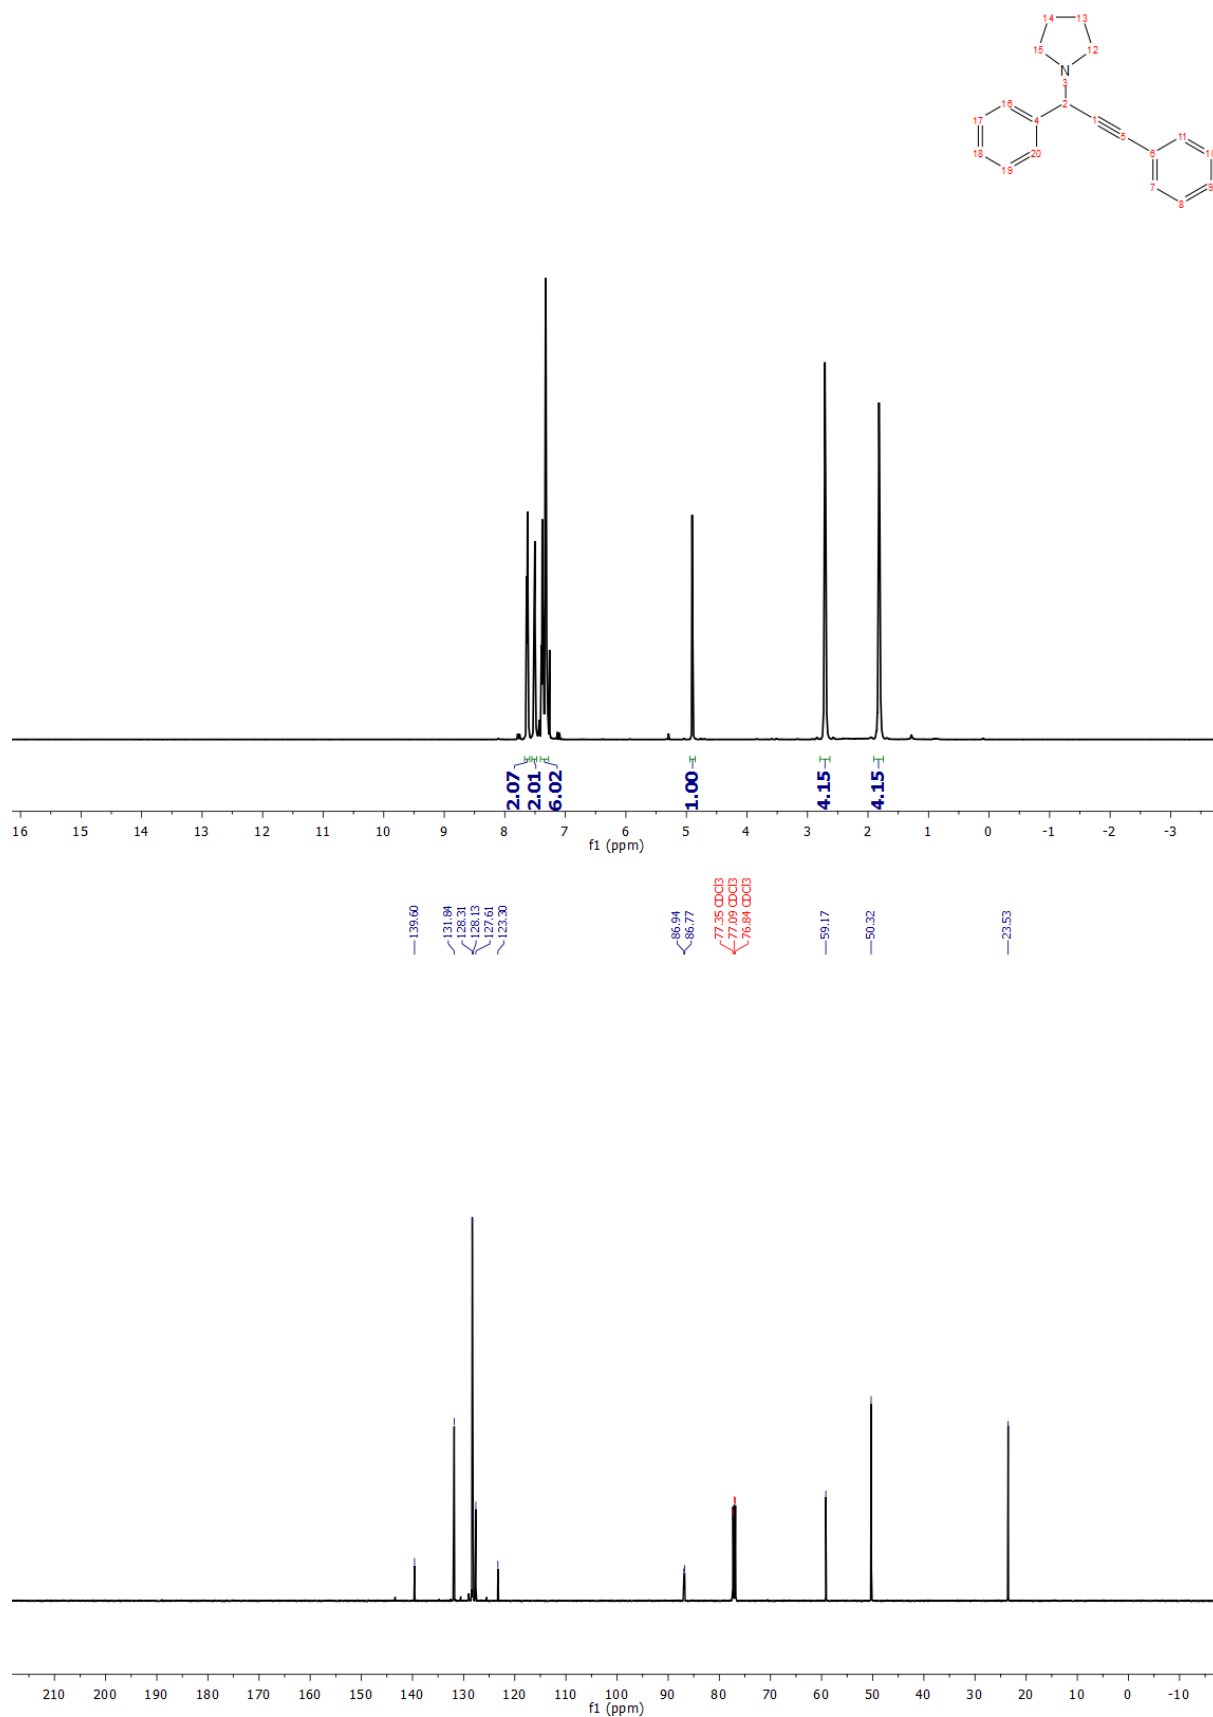

Figure S26. <sup>1</sup>H and <sup>13</sup>C NMR spectra in CDCl<sub>3</sub> for compound 23.

# Stability test of catalyst followed by mass spectrometry.

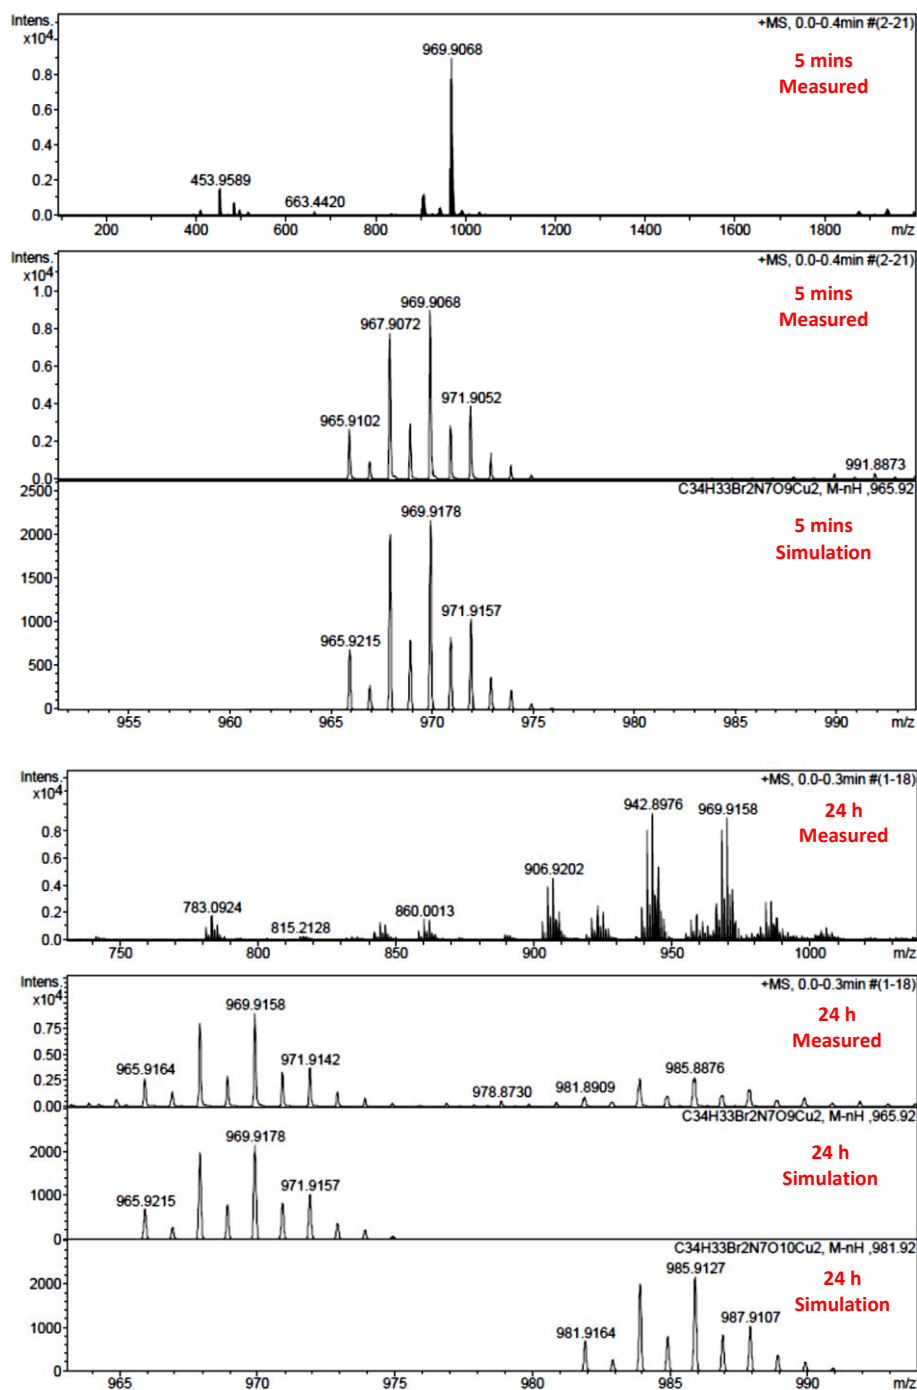

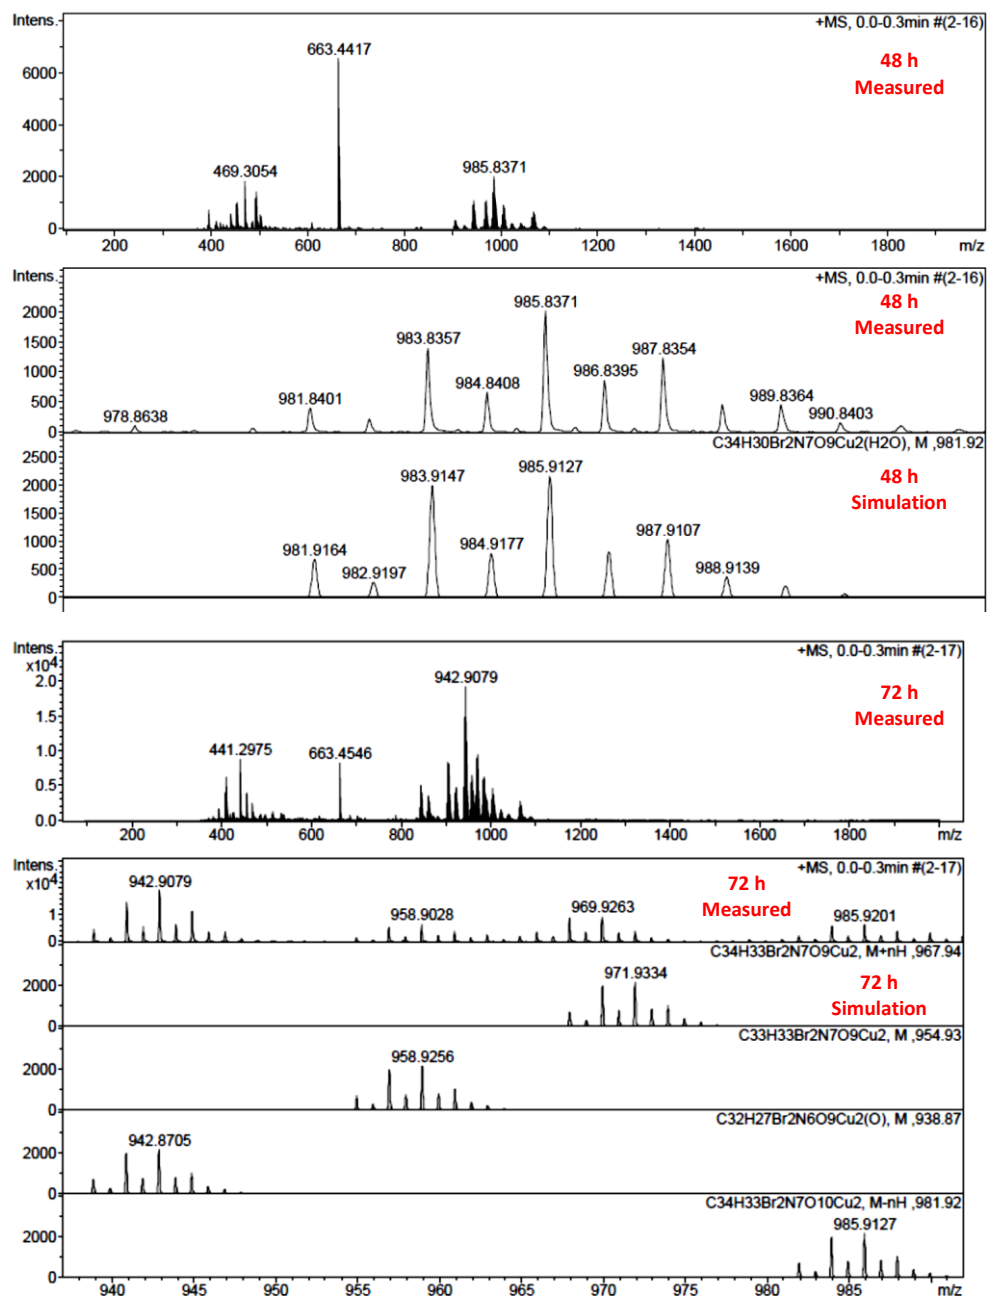

Figure S27. Mass spectra of Cu-catalyst dissolved in *i*-PrOH.
